# Supplementary material for: A recyclable post-synthetically modified Al(iii) based metal–organic framework for fast and selective fluorogenic recognition of bilirubin in human biofluids
Source: Royal Society of Chemistry journal article supplement (doi:10.1039/c9dt01180c), 2019-01-01
Supplement: c9dt01180c1.pdf [file c9dt01180c1.pdf]

Electronic Supplementary Information (ESI) for Dalton Transactions

This journal is © The Royal Society of Chemistry 2019

**Supporting Information For:**

**A recyclable post-synthetically modified Al(III) based metal-organic  
framework for fast and selective fluorogenic recognition of bilirubin in human  
biofluids**

*Soutick Nandi and Shyam Biswas\**

*Department of Chemistry, Indian Institute of Technology Guwahati, Guwahati, 781039 Assam,  
India.*

\* Corresponding author. Tel: 91-3612583309, Fax: 91-3612582349.

E-mail address: sbiswas@iitg.ac.in.

**Materials and Characterization Methods.** All the required chemicals were purchased from commercial sources and used without purification. Fourier transform infrared (FT-IR) spectra were recorded with a Perkin Elmer Spectrum two FT-IR spectrometer in the range of 440-4000  $\text{cm}^{-1}$  with KBr pellet. The below mentioned indications were employed for the characterization of the absorption bands: medium (m), weak (w), broad (br), very strong (vs), strong (s) and shoulder (sh). Ambient temperature X-Ray powder diffraction (XRPD) patterns were collected on a Bruker D2 Phaser X-ray diffractometer (30 kV, 10 mA) using  $\text{Cu-K}\alpha$  ( $\lambda = 1.5406 \text{ \AA}$ ) radiation. FE-SEM images were captured with a Zeiss (Zemini) scanning electron microscope. Thermogravimetric analyses (TGA) were collected under air atmosphere at a heating rate of  $10 \text{ }^\circ\text{C min}^{-1}$  in a temperature region of 25-800  $^\circ\text{C}$  by employing a Netzsch STA-409CD thermal analyzer. Fluorescence emission behavior was recorded by a HORIBA JOBIN YVON Fluoromax-4 spectrofluorometer. The excitation wavelength ( $\lambda_{\text{ex}}$ ) was 325 nm for all the fluorescence experiments. The nitrogen sorption isotherms were performed employing a Quantachrome Autosorb iQ-MP gas sorption analyzer at  $-196 \text{ }^\circ\text{C}$ . Prior to the sorption measurement, degassing of the material was performed at  $120 \text{ }^\circ\text{C}$  for 12 h under dynamic vacuum. A Bruker Avance III 600 spectrometer was utilized for recording  $^1\text{H-NMR}$  at 600 MHz. The mass spectrum (in ESI mode) was measured with an Agilent 6520 Q-TOF high-resolution mass spectrometer. Fluorescence lifetime measurements were performed by time correlated single-photon counting (TCSPC) method by an Edinburgh Instrument Life-Spec II instrument. The fluorescence decays were analyzed by reconvolution method using the FAST software provided by Edinburgh Instruments. Zeta potential was measured with a Zetasizer Nano ZS90 (model no. ZEN3690) instrument. X-ray photoelectron spectroscopy (XPS) measurement was carried out at room temperature using a custom-built near-ambient pressure photoelectron spectrometer (Prevac, Poland). It is equipped with an R3000HP analyser (Scienta) with a twin-anode source and a monochromatic ( $\text{Al-K}\alpha$ ) X-ray source.

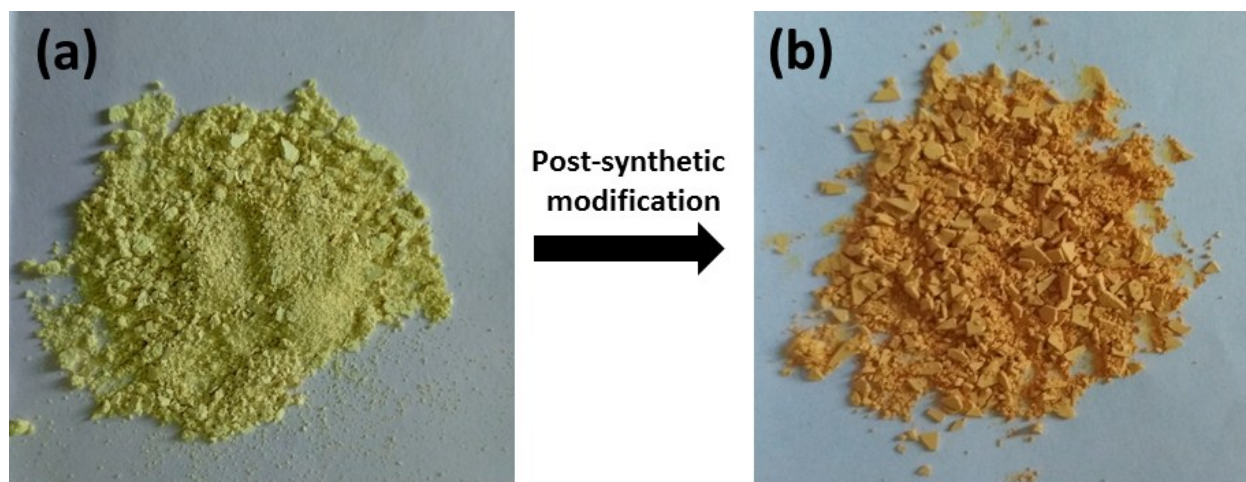

Figure S1. Digital images of  $1\text{-NH}_2$  (a) and  $1\text{-NH}_2\text{@THB}$  (b) in solid state.

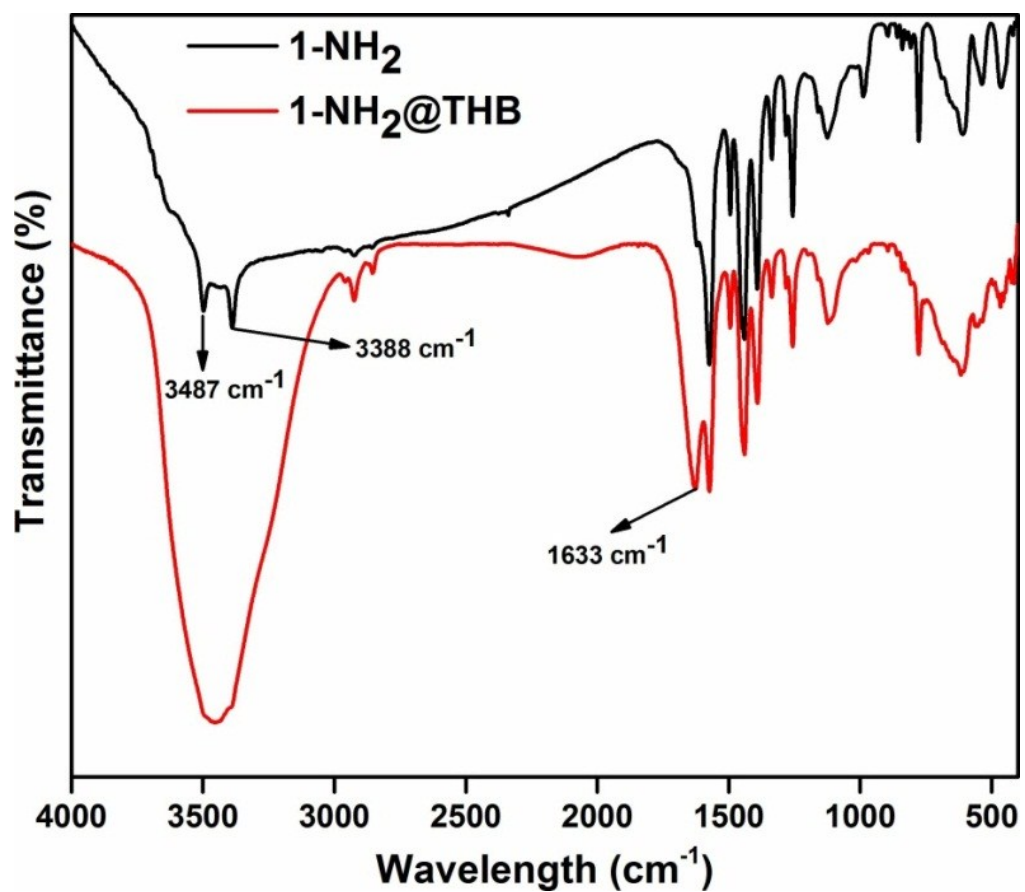

Figure S2. FT-IR spectra of  $1\text{-NH}_2$  (black) and  $1\text{-NH}_2\text{@THB}$  (red).

|               |              |             |        |                 |        |                        |                       |
|---------------|--------------|-------------|--------|-----------------|--------|------------------------|-----------------------|
| Sample Name   | 1-NH2-THBA   | Position    | Vial 1 | Instrument Name | QTOF   | User Name              |                       |
| Inj Vol       | -1           | InjPosition |        | SampleType      | Sample | IRM Calibration Status | Success               |
| Data Filename | 1-NH2-THBA.d | ACQ Method  |        | Comment         |        | Acquired Time          | 7/26/2018 11:34:07 AM |

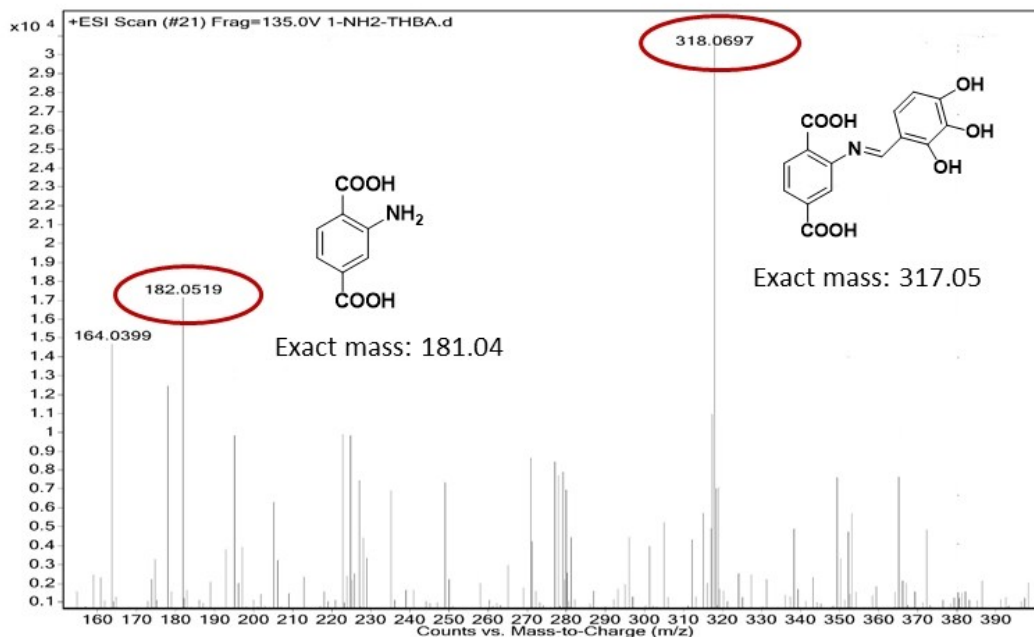

**Figure S3.** ESI-MS spectrum of the digested framework of **1-NH<sub>2</sub>@THB** showing m/z (positive ion mode) peaks at 182.0519 and 318.0697, which correspond to (M+H)<sup>+</sup> ion (M = mass of ligands) of H<sub>2</sub>BDC-NH<sub>2</sub> ligand and the imine-functionalized ligand, respectively. This spectrum further confirms the formation of imine bond. *Digestion protocol of the MOF sample for recording ESI-MS spectrum:* 10 mg of MOF sample was added to 1.0 mL of DMSO. To this solution, 1.0 mL of saturated K<sub>3</sub>PO<sub>4</sub> (in H<sub>2</sub>O) was added. After sonication for 5 min, the MOF sample was totally dissolved. The organic phase was separated and diluted with HPLC grade methanol for ESI-MS analysis.

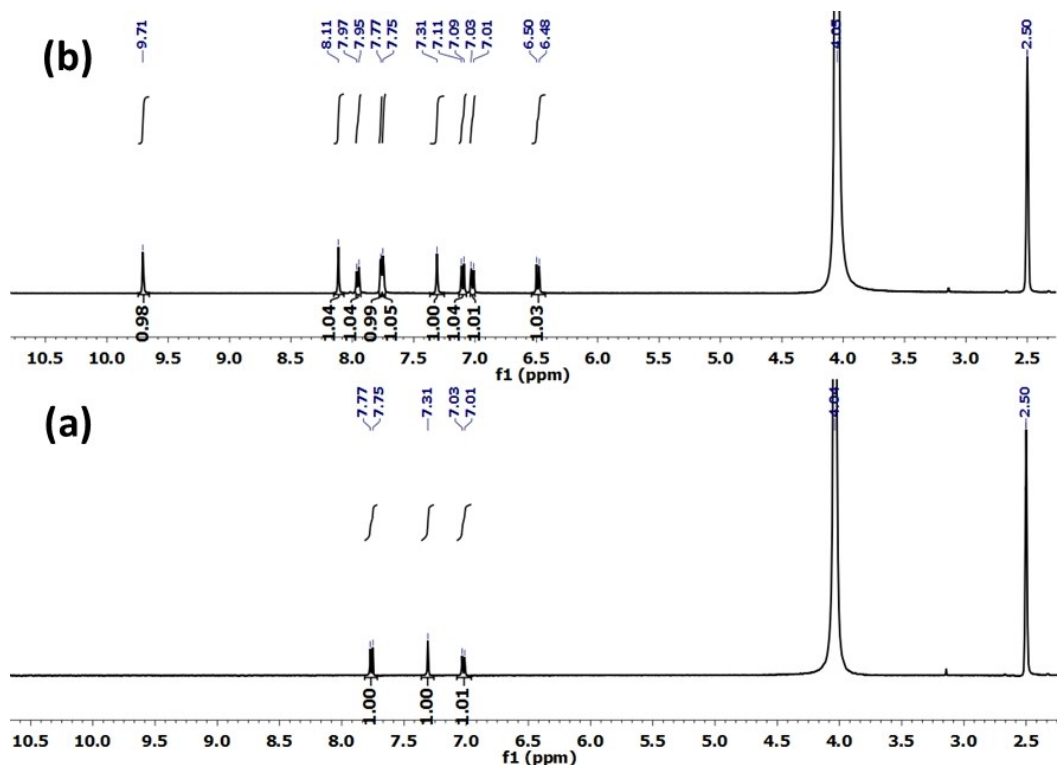

**Figure S4.**  $^1\text{H}$  NMR spectra of (a) **1-NH<sub>2</sub>** and (b) **1-NH<sub>2</sub>@THB** after framework digestion in  $\text{K}_3\text{PO}_4/\text{D}_2\text{O}$ . The assignment of the NMR peaks for **1-NH<sub>2</sub>@THB** was interpreted according to the presence of the new peaks observed for the phenyl and imine moiety. To calculate the percent of conversion, the aromatic proton peaks corresponding to  $\text{H}_2\text{BDC-NH}_2$  ligand were set to an integration of 1 and all new peaks were integrated accordingly. For **1-NH<sub>2</sub>@THB**, new peaks are all approx.  $\sim 1.04$  with respect to aromatic protons of  $\text{H}_2\text{BDC-NH}_2$  ligand, corresponding to a conversion of  $\sim 51\%$ . *Digestion protocol of the MOF sample for recording NMR spectra:* 10 mg of each MOF sample was added to 400  $\mu\text{L}$  of  $\text{DMSO-}d_6$ . To this solution, 200  $\mu\text{L}$  of saturated  $\text{K}_3\text{PO}_4$  in  $\text{D}_2\text{O}$  was added. After shaking for 5 min, the MOF sample was totally dissolved and the organic phase was analyzed by  $^1\text{H}$  NMR spectroscopy immediately.

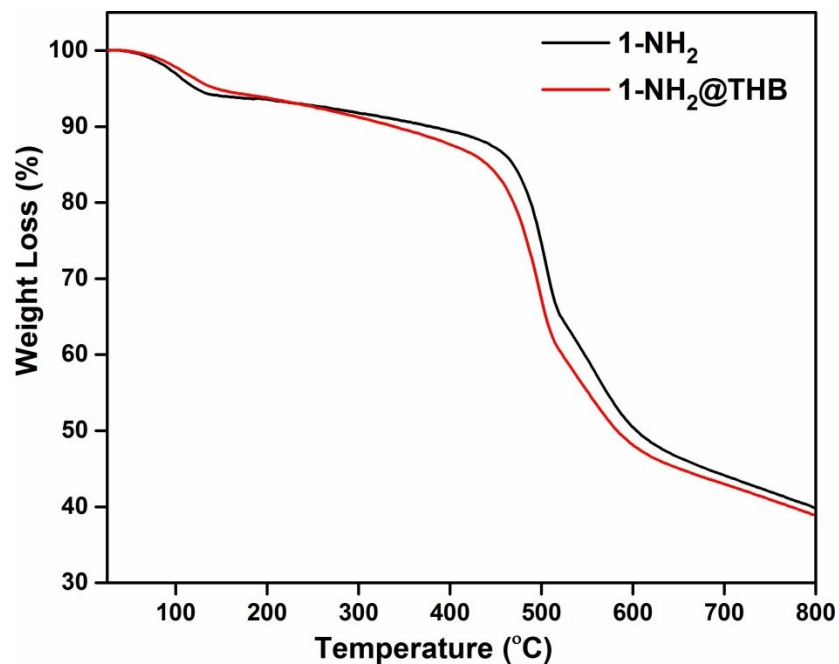

**Figure S5.** TG curves of  $1\text{-NH}_2$  and  $1\text{-NH}_2\text{@THB}$  recorded in the temperature range of 25-800 °C with a heating rate of  $10\text{ °C min}^{-1}$ .

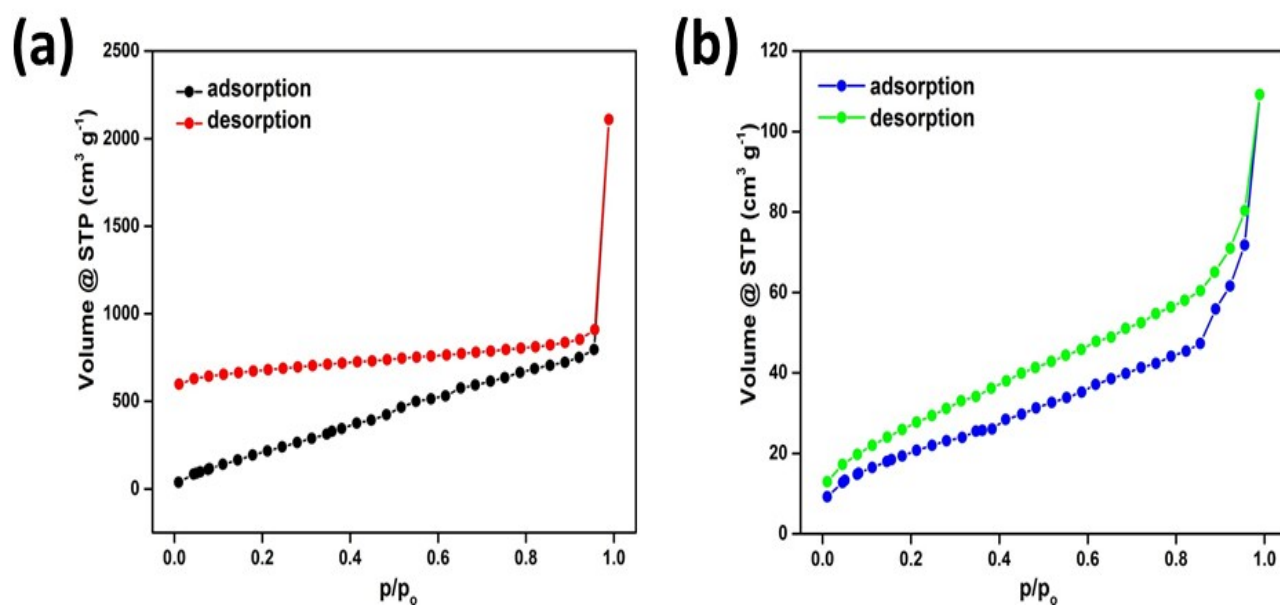

**Figure S6.**  $\text{N}_2$  adsorption and desorption isotherms of  $1\text{-NH}_2$  (a) and  $1\text{-NH}_2\text{@THB}$  (b) recorded at  $-196\text{ °C}$ .

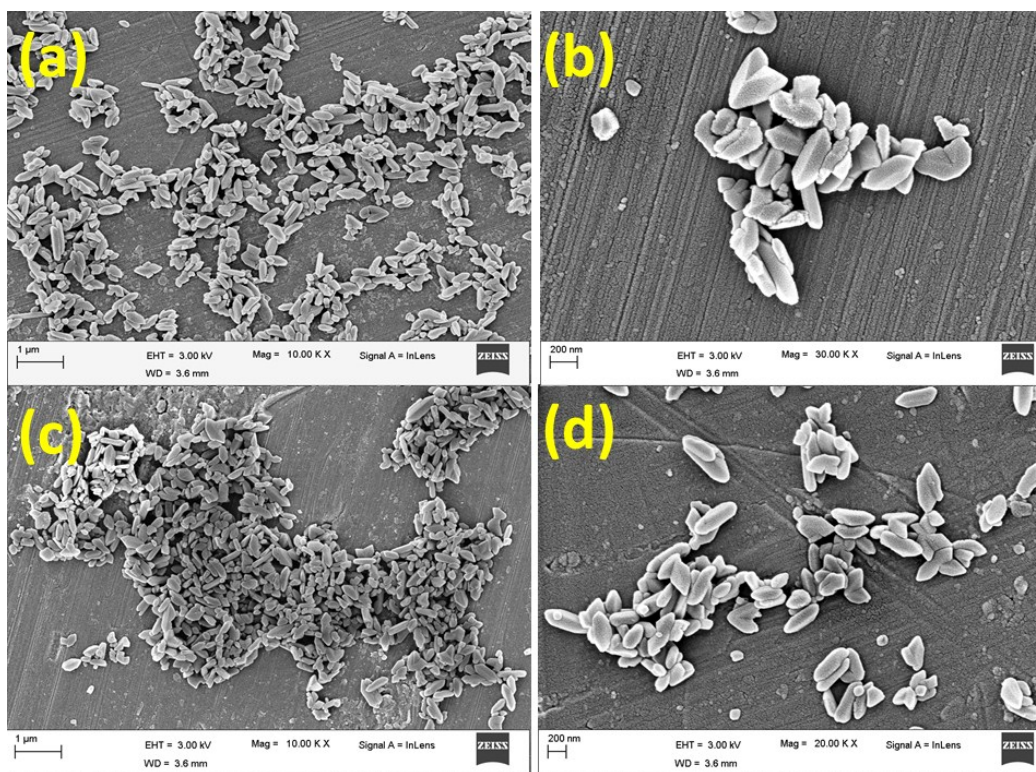

**Figure S7.** FE-SEM images of 1-NH<sub>2</sub> (a, b) and 1-NH<sub>2</sub>@THB (c, d).

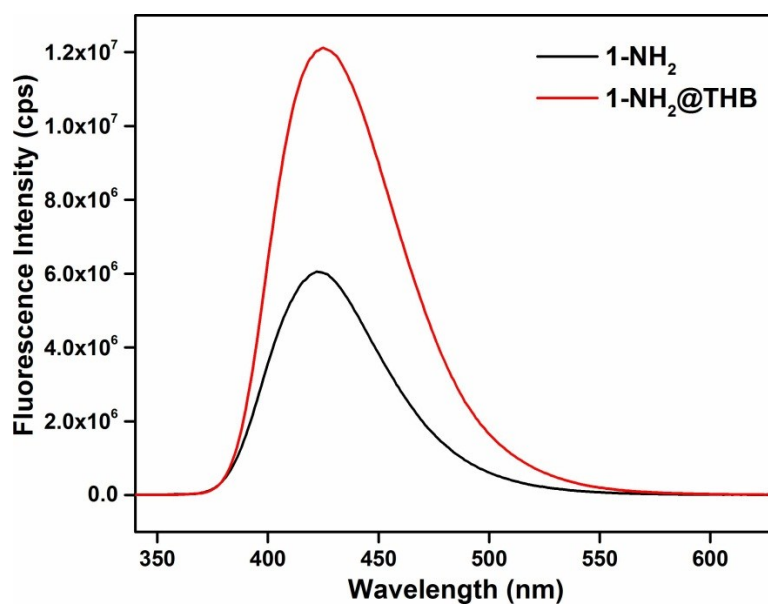

**Figure S8.** Fluorescence emission spectra of 1-NH<sub>2</sub> (black) and 1-NH<sub>2</sub>@THB (red).

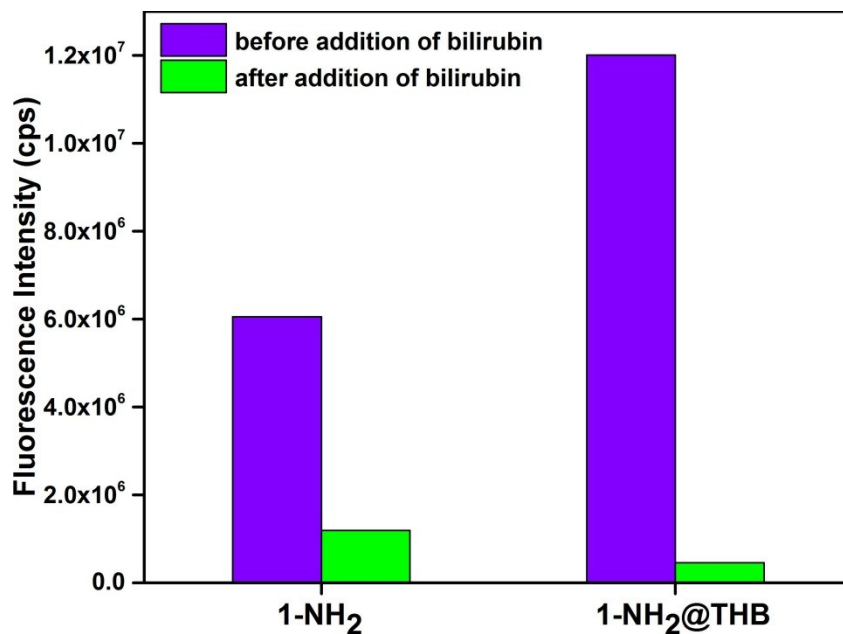

**Figure S9.** Fluorescence emission intensity of **1-NH<sub>2</sub>** and **1-NH<sub>2</sub>@THB** before and after addition of bilirubin.

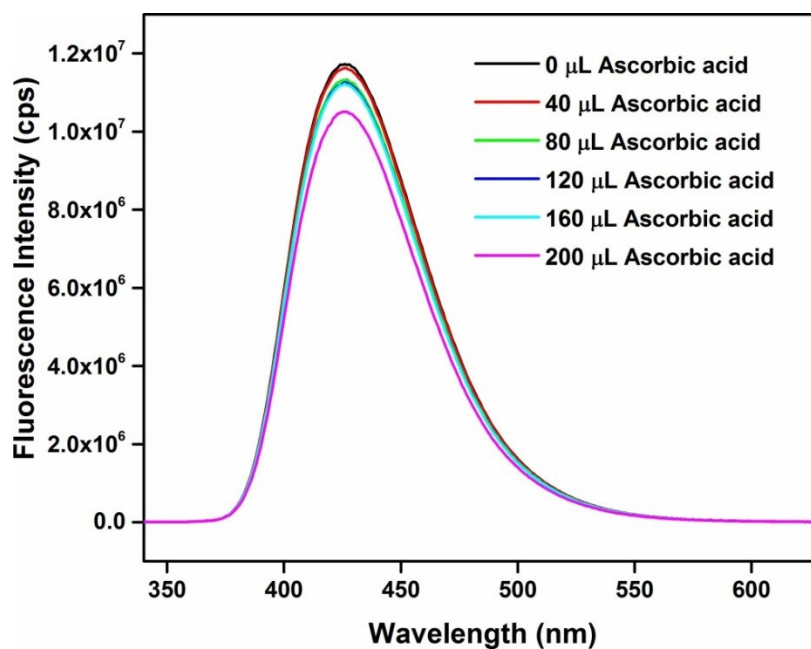

**Figure S10.** Change in the fluorescence emission intensity of **1-NH<sub>2</sub>@THB** upon incremental addition of 1 mM ascorbic acid solution ( $\lambda_{\text{ex}} = 325$  nm and  $\lambda_{\text{em}} = 429$  nm).



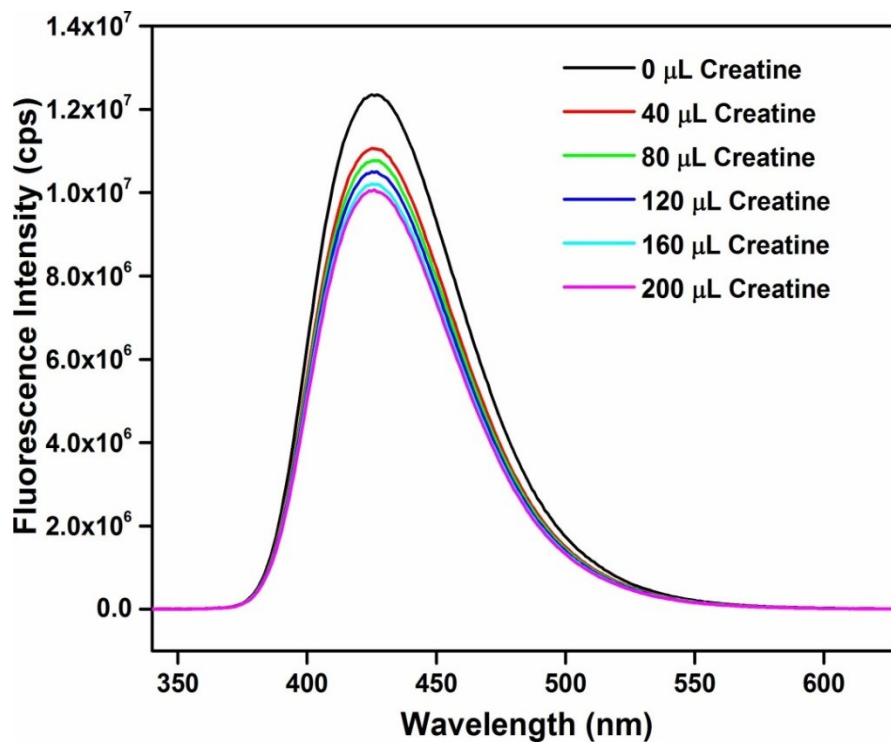

**Figure S11.** Change in the fluorescence emission intensity of **1-NH<sub>2</sub>@THB** upon incremental addition of 1 mM creatine solution ( $\lambda_{\text{ex}} = 325 \text{ nm}$  and  $\lambda_{\text{em}} = 429 \text{ nm}$ ).

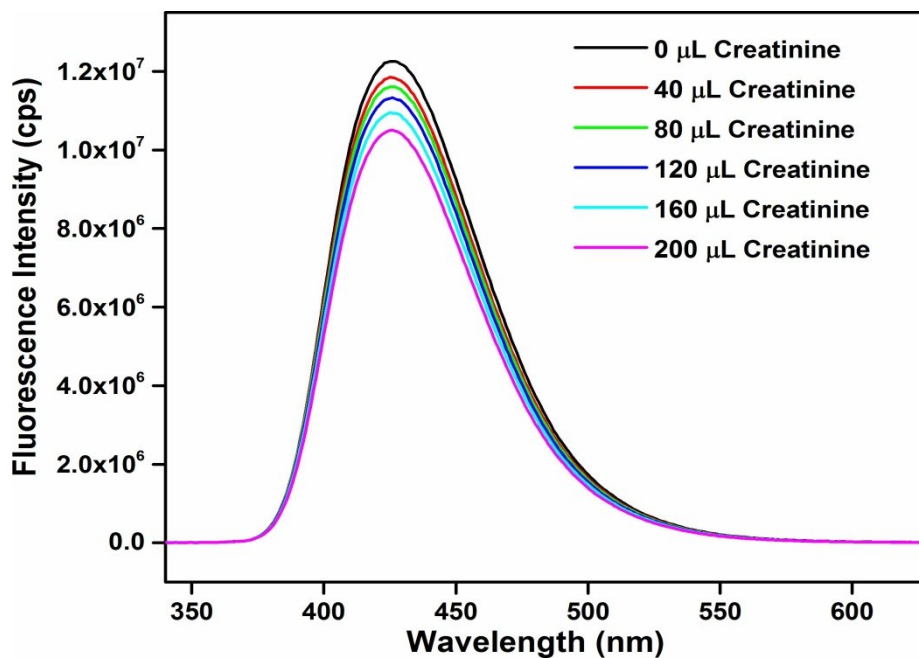

**Figure S12.** Change in the fluorescence emission intensity of **1-NH<sub>2</sub>@THB** upon incremental addition of 1 mM creatinine solution ( $\lambda_{\text{ex}} = 325 \text{ nm}$  and  $\lambda_{\text{em}} = 429 \text{ nm}$ ).

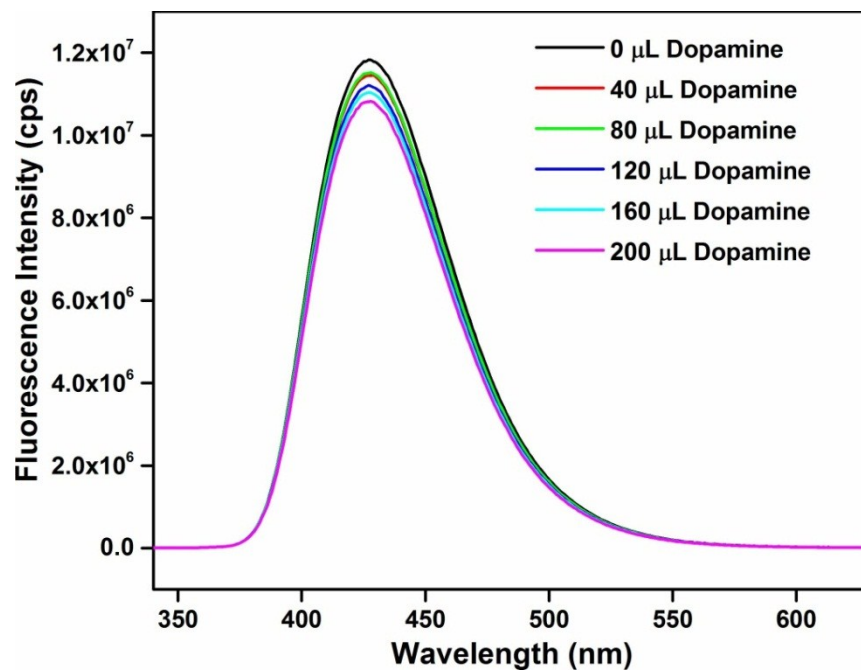

**Figure S13.** Change in the fluorescence emission intensity of **1-NH<sub>2</sub>@THB** upon incremental addition of 1 mM dopamine solution ( $\lambda_{\text{ex}} = 325 \text{ nm}$  and  $\lambda_{\text{em}} = 429 \text{ nm}$ ).

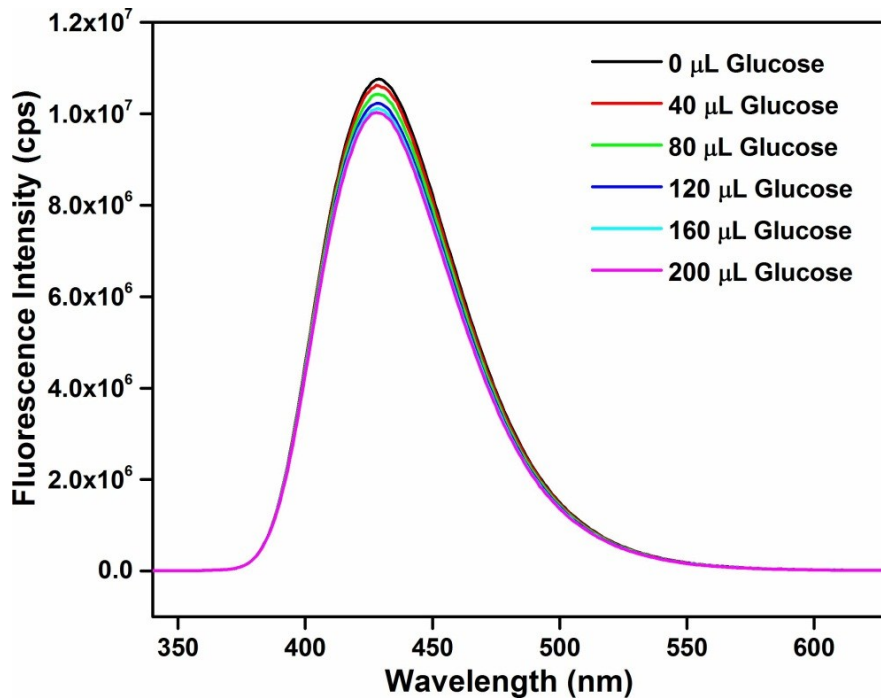

**Figure S14.** Change in the fluorescence emission intensity of **1-NH<sub>2</sub>@THB** upon incremental addition of 1 mM glucose solution ( $\lambda_{\text{ex}} = 325 \text{ nm}$  and  $\lambda_{\text{em}} = 429 \text{ nm}$ ).

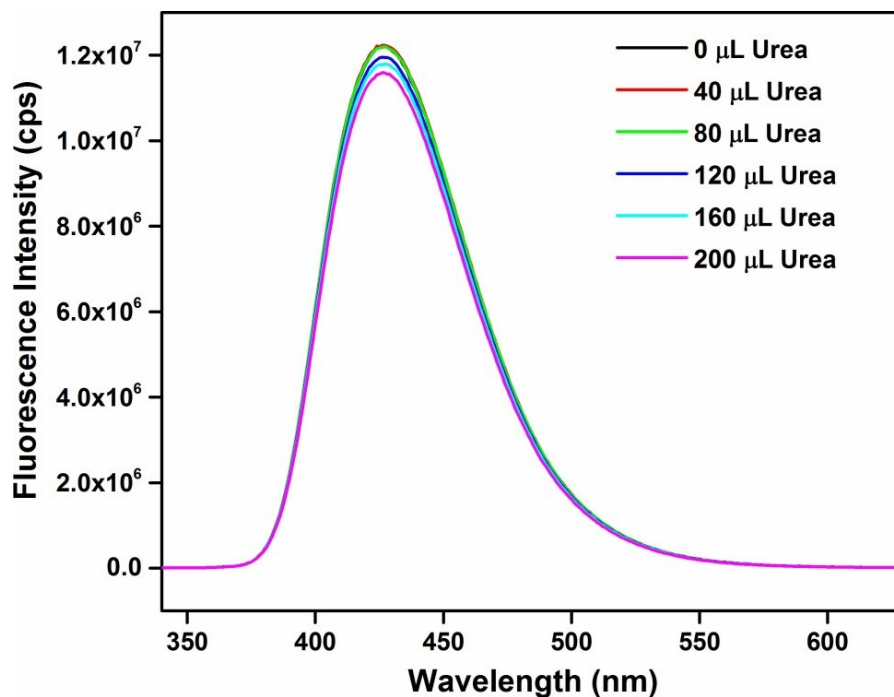

**Figure S15.** Change in the fluorescence emission intensity of **1-NH<sub>2</sub>@THB** upon incremental addition of 1 mM urea solution ( $\lambda_{\text{ex}}=325$  nm and  $\lambda_{\text{em}}=429$  nm).

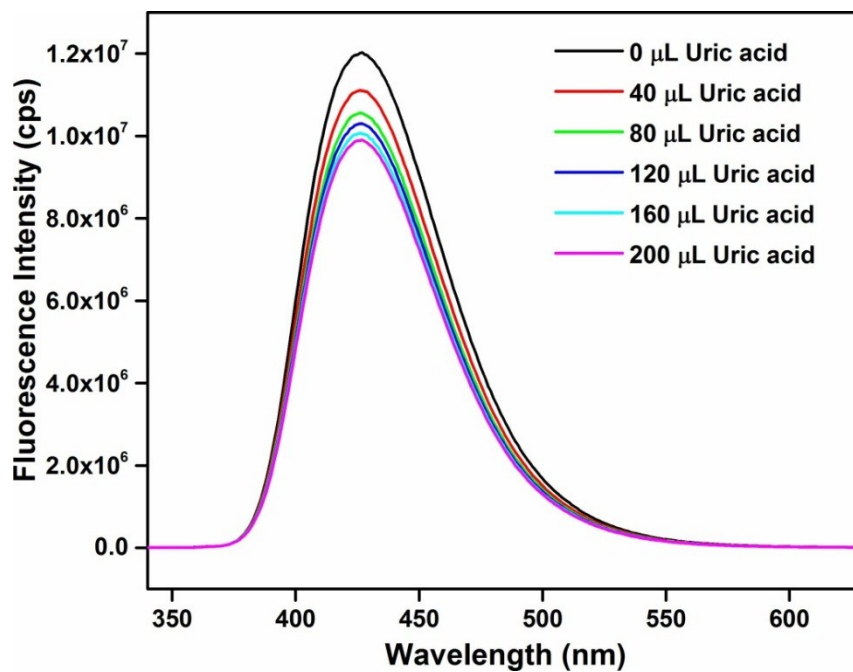

**Figure S16.** Change in the fluorescence emission intensity of **1-NH<sub>2</sub>@THB** upon incremental addition of 1 mM uric acid solution ( $\lambda_{\text{ex}}=325$  nm and  $\lambda_{\text{em}}=429$  nm).

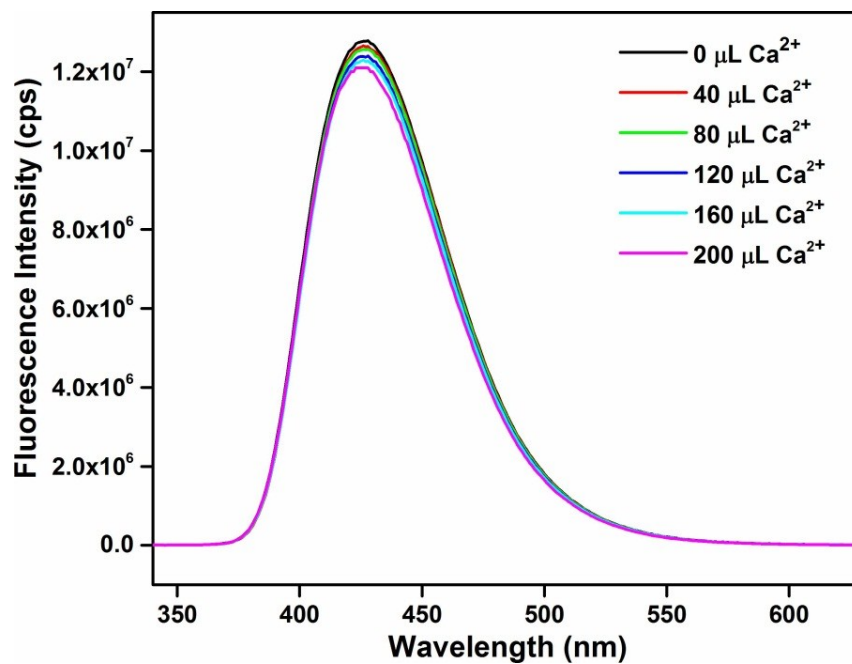

**Figure S17.** Change in the fluorescence emission intensity of 1-NH<sub>2</sub>@THB upon incremental addition of 1 mM Ca<sup>2+</sup> solution ( $\lambda_{\text{ex}}=325$  nm and  $\lambda_{\text{em}}=429$  nm).

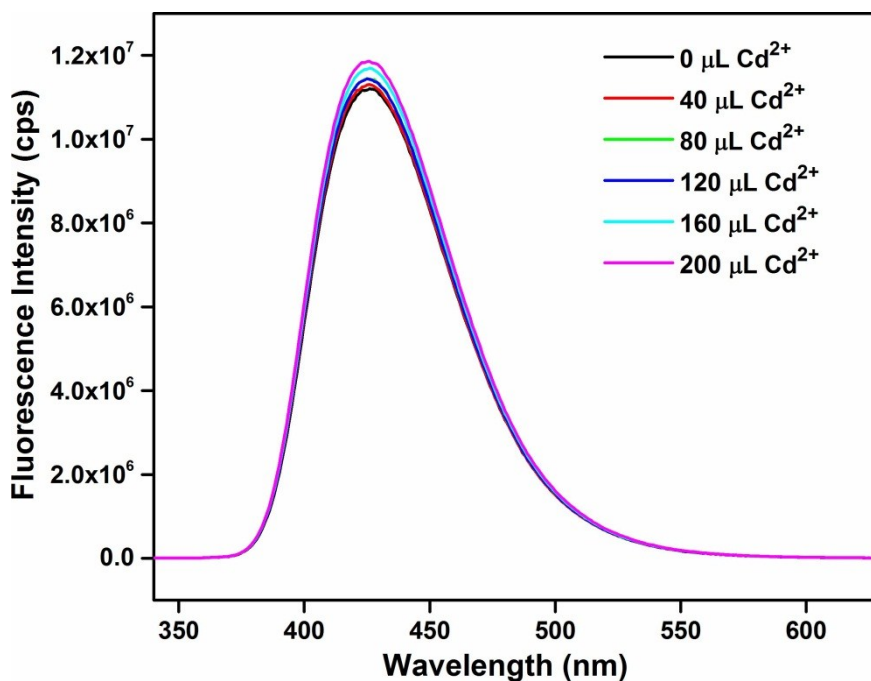

**Figure S18.** Change in the fluorescence emission intensity of 1-NH<sub>2</sub>@THB upon incremental addition of 1 mM Cd<sup>2+</sup> solution ( $\lambda_{\text{ex}}=325$  nm and  $\lambda_{\text{em}}=429$  nm).

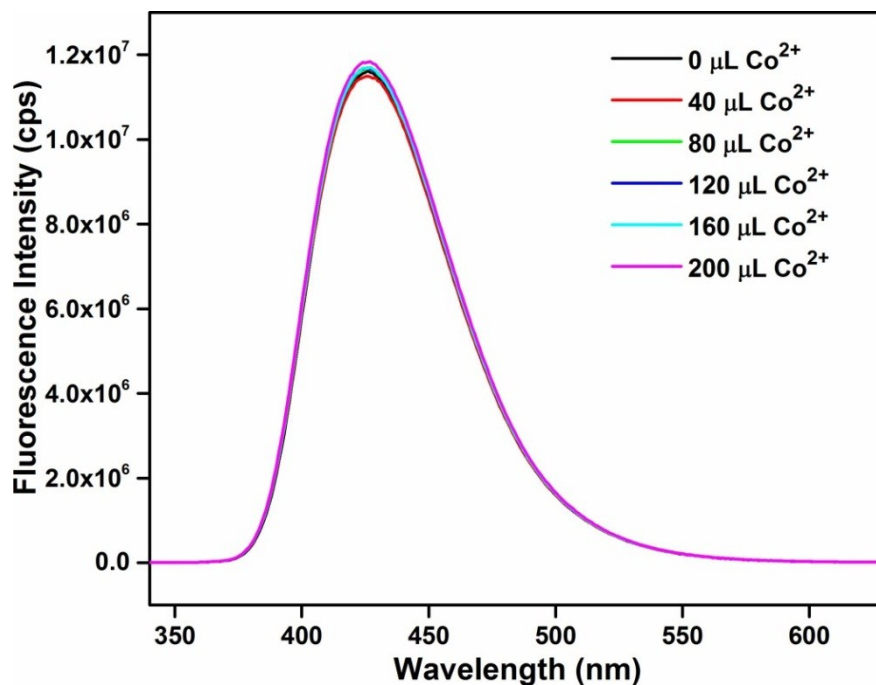

**Figure S19.** Change in the fluorescence emission intensity of 1-NH<sub>2</sub>@THB upon incremental addition of 1 mM Co<sup>2+</sup> solution ( $\lambda_{\text{ex}} = 325$  nm and  $\lambda_{\text{em}} = 429$  nm).

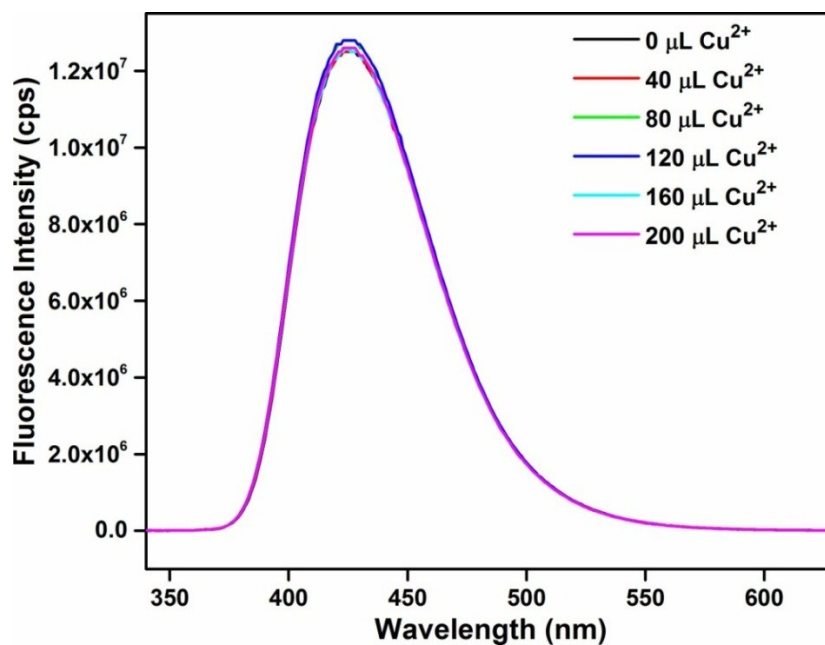

**Figure S20.** Change in the fluorescence emission intensity of 1-NH<sub>2</sub>@THB upon incremental addition of 1 mM Cu<sup>2+</sup> solution ( $\lambda_{\text{ex}} = 325$  nm and  $\lambda_{\text{em}} = 429$  nm).

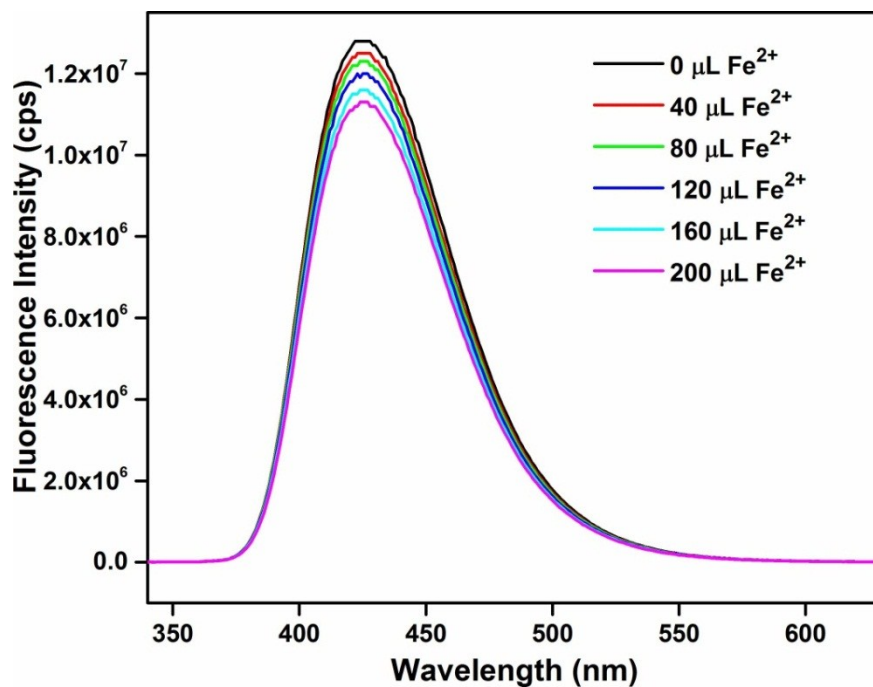

**Figure S21.** Change in the fluorescence emission intensity of 1-NH<sub>2</sub>@THB upon incremental addition of 1 mM Fe<sup>2+</sup> solution ( $\lambda_{\text{ex}} = 325$  nm and  $\lambda_{\text{em}} = 429$  nm).

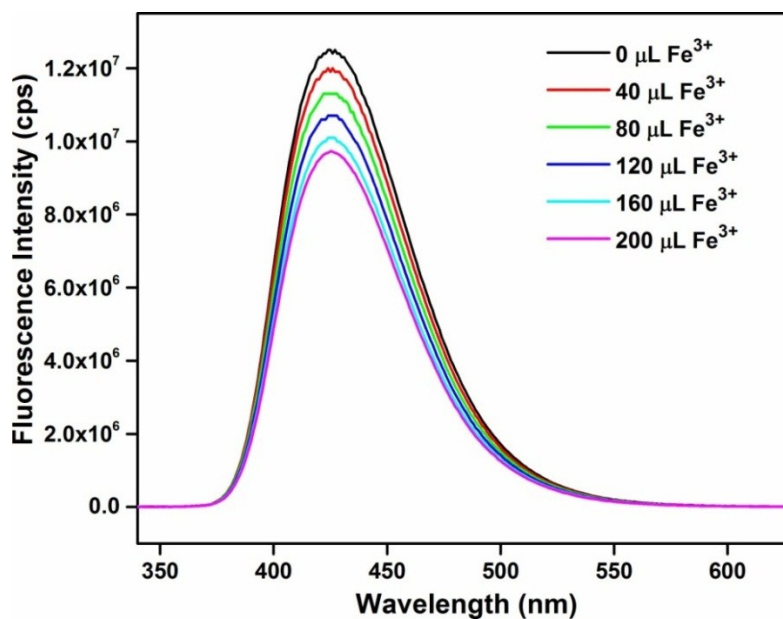

**Figure S22.** Change in the fluorescence emission intensity of 1-NH<sub>2</sub>@THB upon incremental addition of 1 mM Fe<sup>3+</sup> solution ( $\lambda_{\text{ex}} = 325$  nm and  $\lambda_{\text{em}} = 429$  nm).

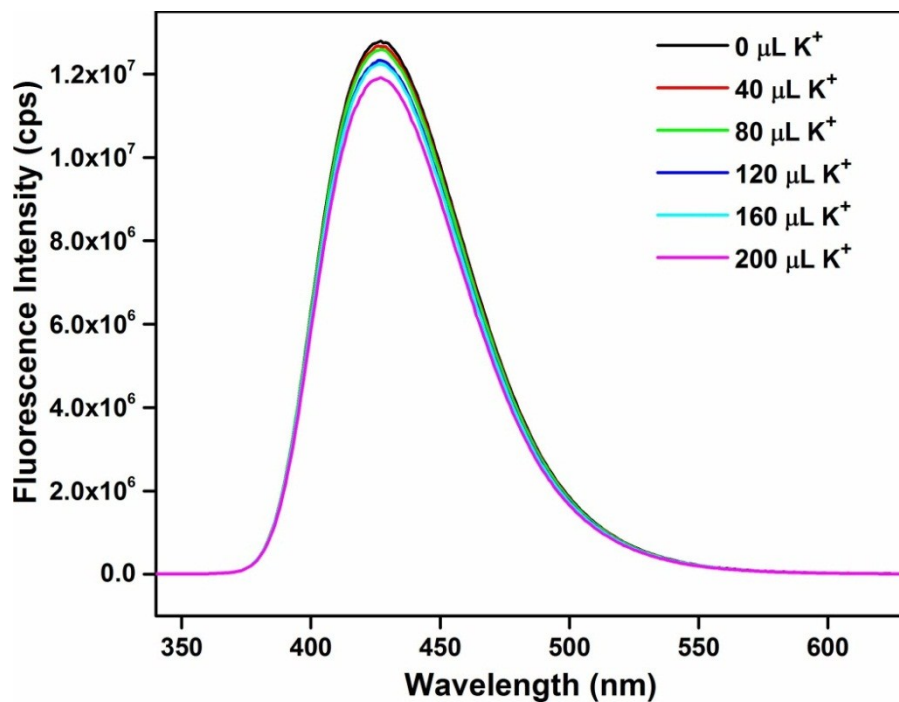

**Figure S23.** Change in the fluorescence emission intensity of 1-NH<sub>2</sub>@THB upon incremental addition of 1 mM K<sup>+</sup> solution ( $\lambda_{\text{ex}}=325$  nm and  $\lambda_{\text{em}}=429$  nm).

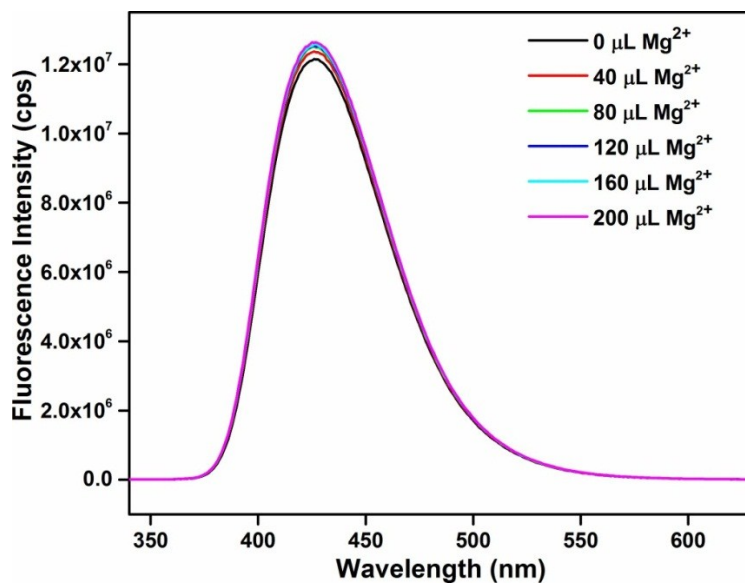

**Figure S24.** Change in the fluorescence emission intensity of 1-NH<sub>2</sub>@THB upon incremental addition of 1 mM Mg<sup>2+</sup> solution ( $\lambda_{\text{ex}}=325$  nm and  $\lambda_{\text{em}}=429$  nm).

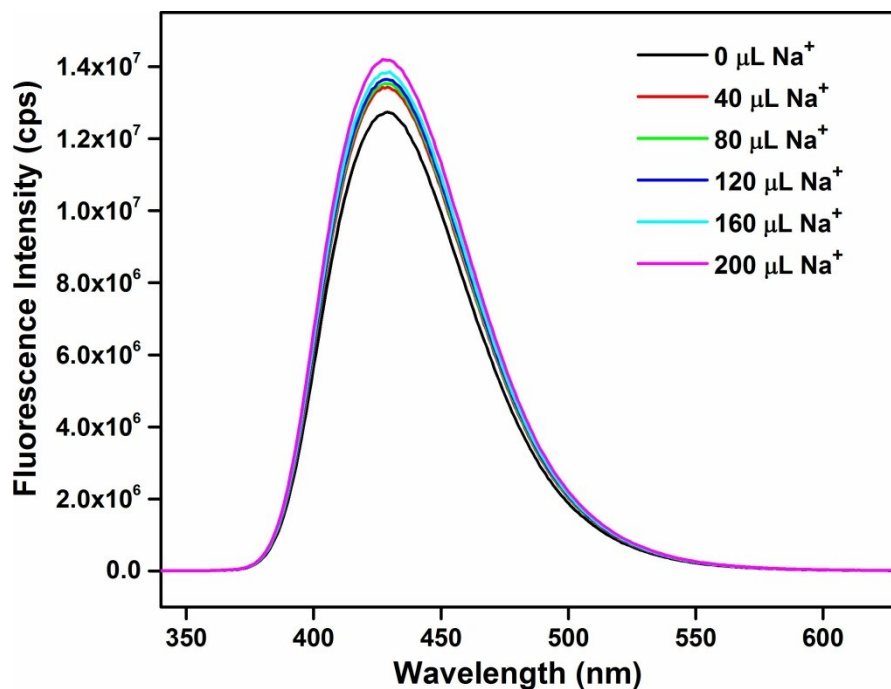

**Figure S25.** Change in the fluorescence emission intensity of **1-NH<sub>2</sub>@THB** upon incremental addition of 1 mM Na<sup>+</sup> solution ( $\lambda_{\text{ex}}=325$  nm and  $\lambda_{\text{em}}=429$  nm).

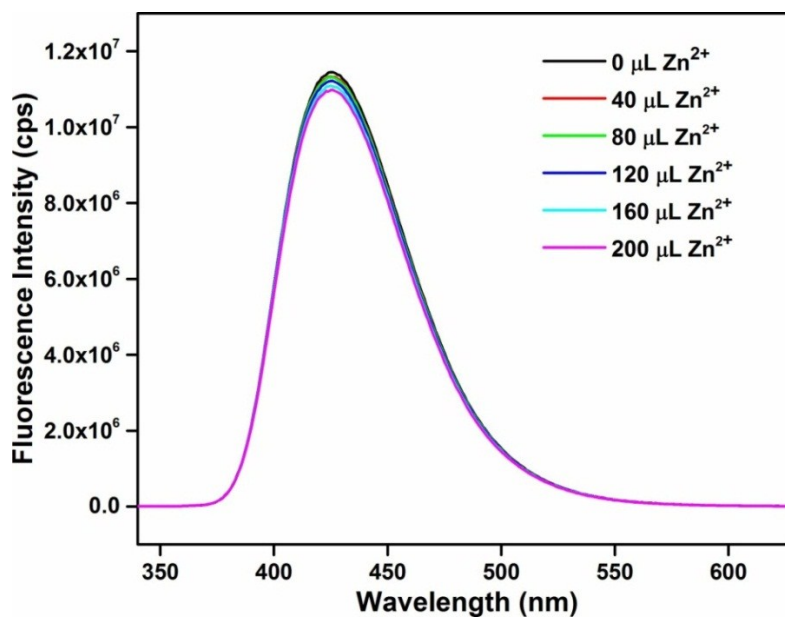

**Figure S26.** Change in the fluorescence emission intensity of **1-NH<sub>2</sub>@THB** upon incremental addition of 1 mM Zn<sup>2+</sup> solution ( $\lambda_{\text{ex}}=325$  nm and  $\lambda_{\text{em}}=429$  nm).



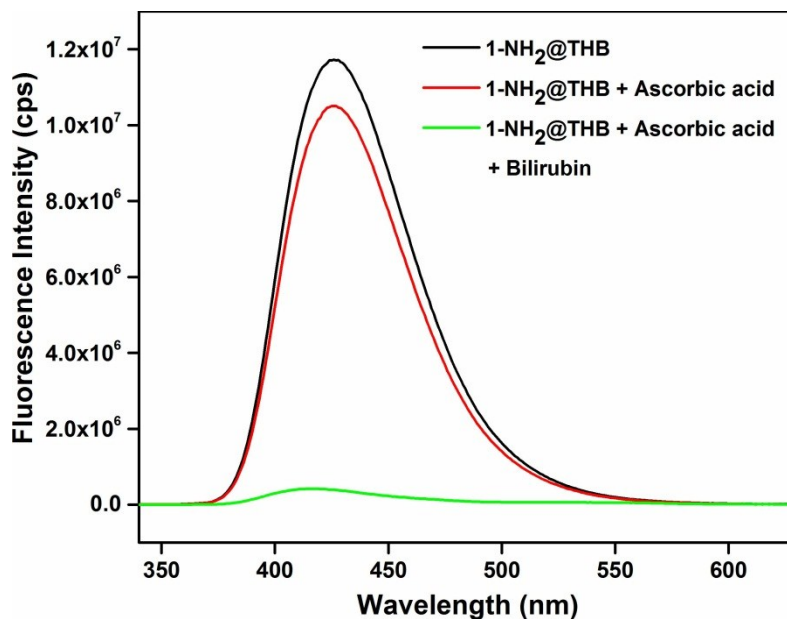

**Figure S27.** Change in the fluorescence emission intensity of **1-NH<sub>2</sub>@THB** upon addition of 1 mM bilirubin solution (200  $\mu$ L) in presence of ascorbic acid (200  $\mu$ L) solution ( $\lambda_{\text{ex}}$ = 325 nm and  $\lambda_{\text{em}}$ = 429 nm).

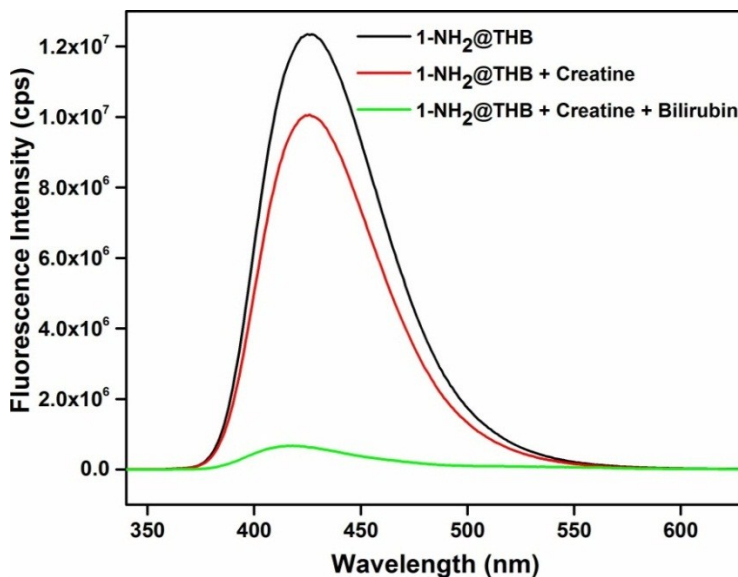

**Figure S28.** Change in the fluorescence emission intensity of **1-NH<sub>2</sub>@THB** upon addition of 1 mM bilirubin solution (200  $\mu$ L) in presence of creatine (200  $\mu$ L) solution ( $\lambda_{\text{ex}}$ = 325 nm and  $\lambda_{\text{em}}$ = 429 nm).

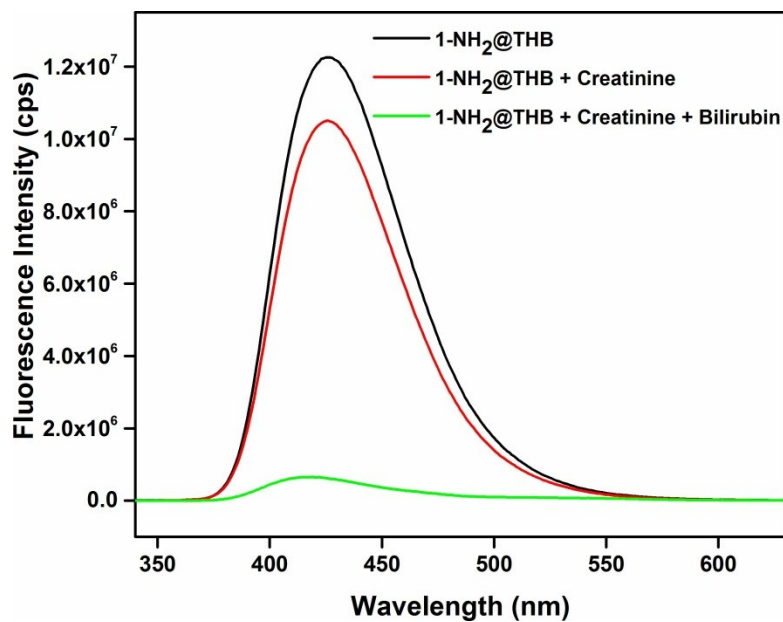

**Figure S29.** Change in the fluorescence emission intensity of **1-NH<sub>2</sub>@THB** upon addition of 1 mM bilirubin solution (200  $\mu$ L) in presence of creatinine (200  $\mu$ L) solution ( $\lambda_{\text{ex}} = 325$  nm and  $\lambda_{\text{em}} = 429$  nm).

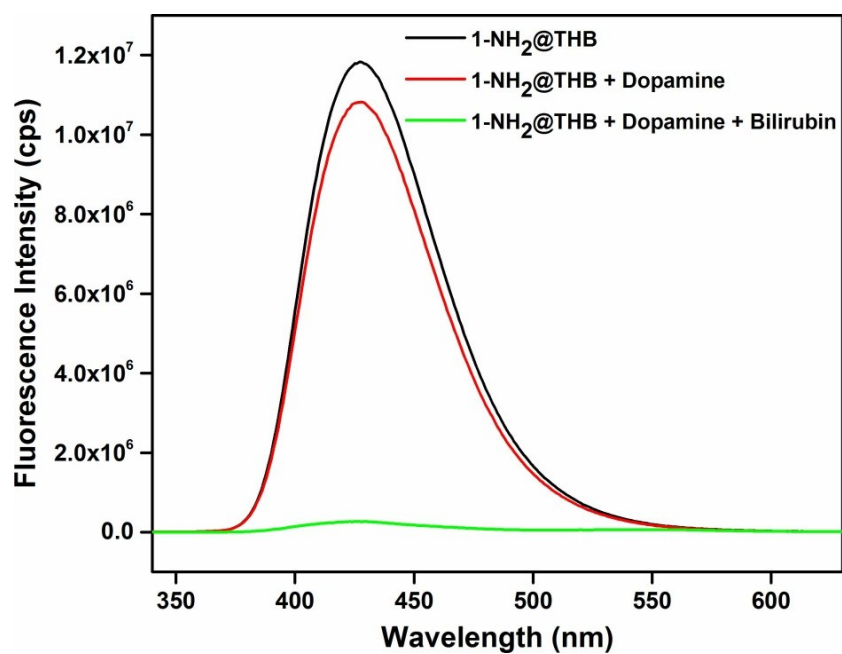

**Figure S30.** Change in the fluorescence emission intensity of **1-NH<sub>2</sub>@THB** upon addition of 1 mM bilirubin solution (200  $\mu$ L) in presence of dopamine (200  $\mu$ L) solution ( $\lambda_{\text{ex}} = 325$  nm and  $\lambda_{\text{em}} = 429$  nm).

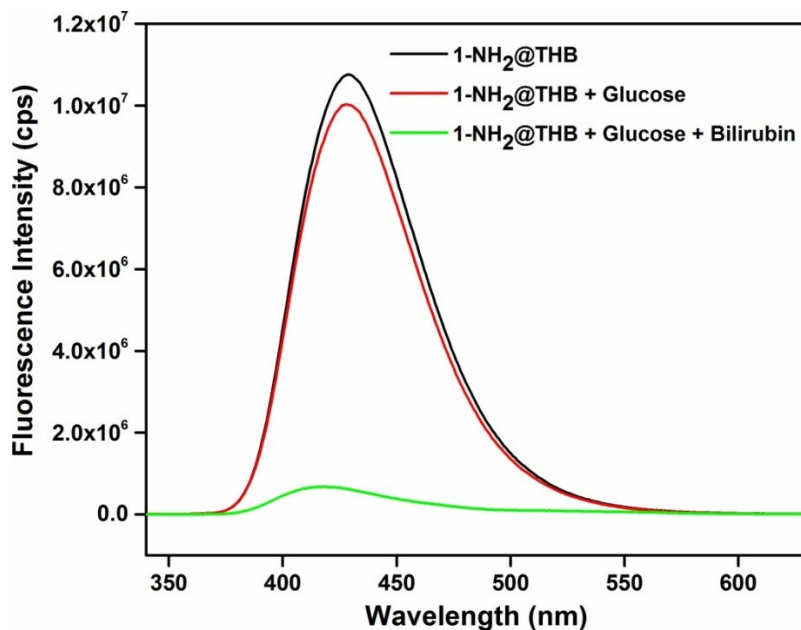

**Figure S31.** Change in the fluorescence emission intensity of **1-NH<sub>2</sub>@THB** upon addition of 1 mM bilirubin solution (200  $\mu$ L) in presence of glucose (200  $\mu$ L) solution ( $\lambda_{\text{ex}}$ = 325 nm and  $\lambda_{\text{em}}$ = 429 nm).

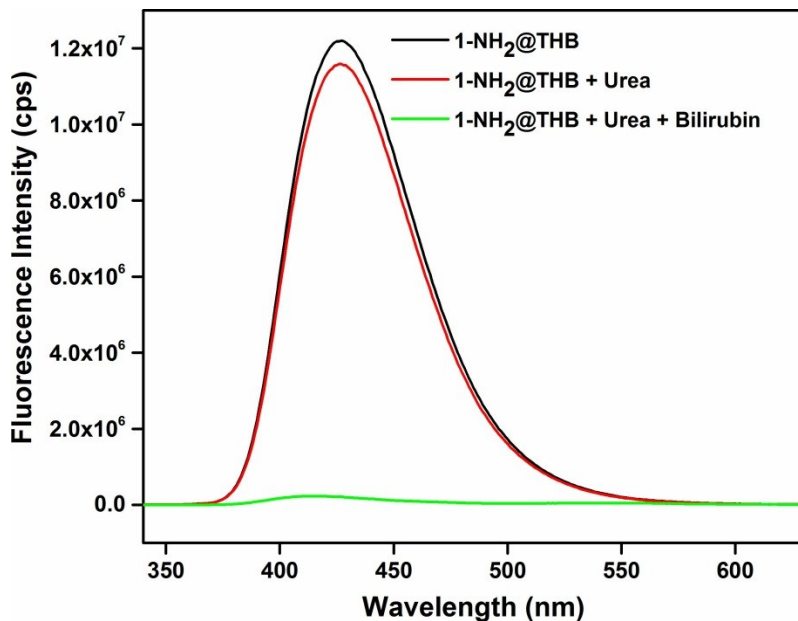

**Figure S32.** Change in the fluorescence emission intensity of **1-NH<sub>2</sub>@THB** upon addition of 1 mM bilirubin solution (200  $\mu$ L) in presence of urea (200  $\mu$ L) solution ( $\lambda_{\text{ex}}$ = 325 nm and  $\lambda_{\text{em}}$ = 429 nm).

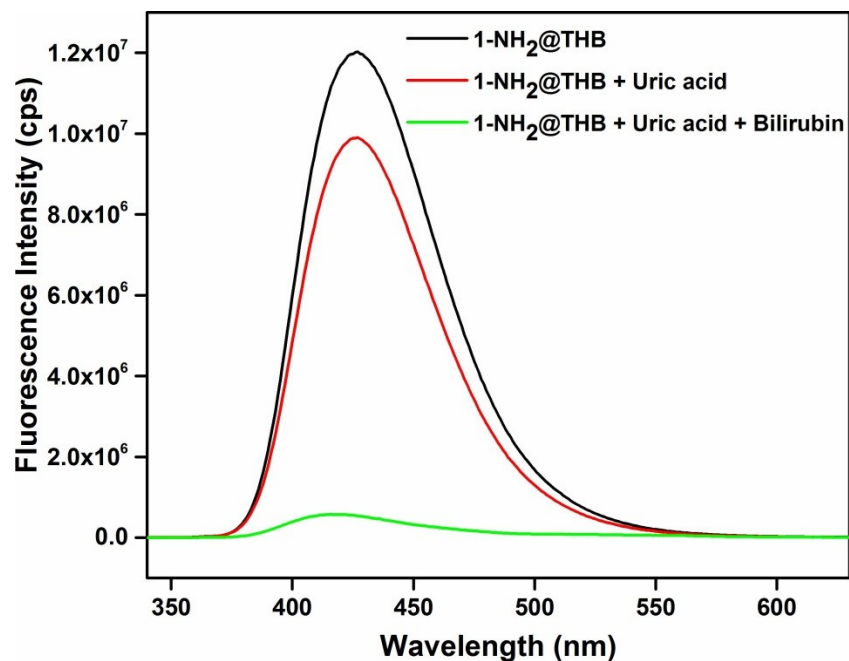

**Figure S33.** Change in the fluorescence emission intensity of **1-NH<sub>2</sub>@THB** upon addition of 1 mM bilirubin solution (200  $\mu$ L) in presence of uric acid (200  $\mu$ L) solution ( $\lambda_{\text{ex}}$ = 325 nm and  $\lambda_{\text{em}}$ = 429 nm).

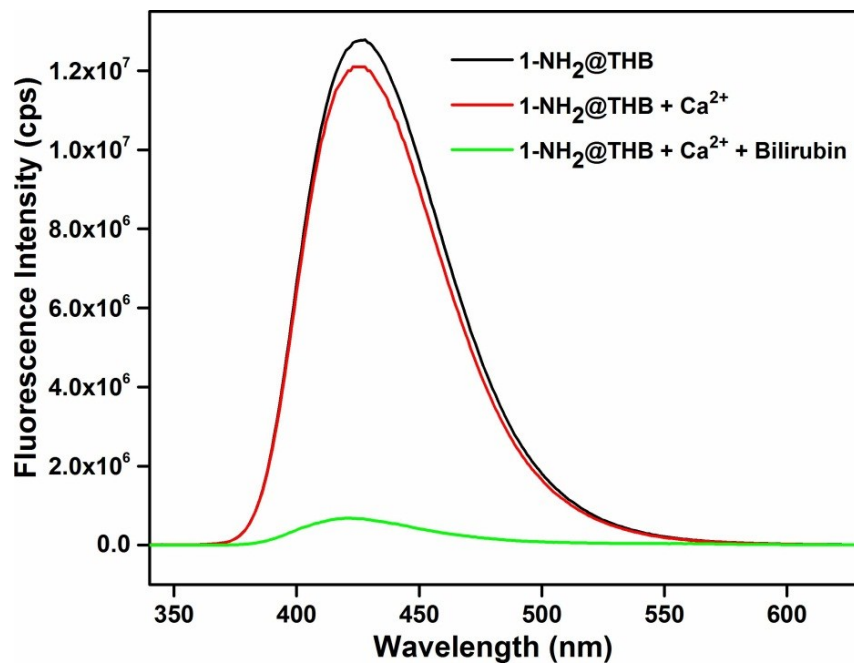

**Figure S34.** Change in the fluorescence emission intensity of **1-NH<sub>2</sub>@THB** upon addition of 1 mM bilirubin solution (200  $\mu$ L) in presence of Ca<sup>2+</sup> (200  $\mu$ L) solution ( $\lambda_{\text{ex}}$ = 325 nm and  $\lambda_{\text{em}}$ = 429 nm).

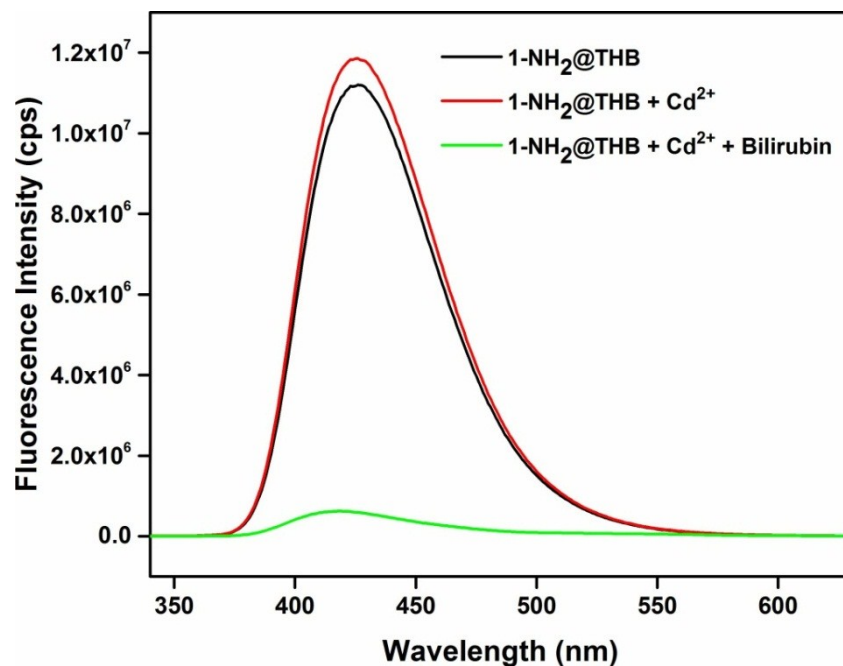

**Figure S35.** Change in the fluorescence emission intensity of **1-NH<sub>2</sub>@THB** upon addition of 1 mM bilirubin solution (200  $\mu$ L) in presence of Cd<sup>2+</sup> (200  $\mu$ L) solution ( $\lambda_{\text{ex}}$ = 325 nm and  $\lambda_{\text{em}}$ = 429 nm).

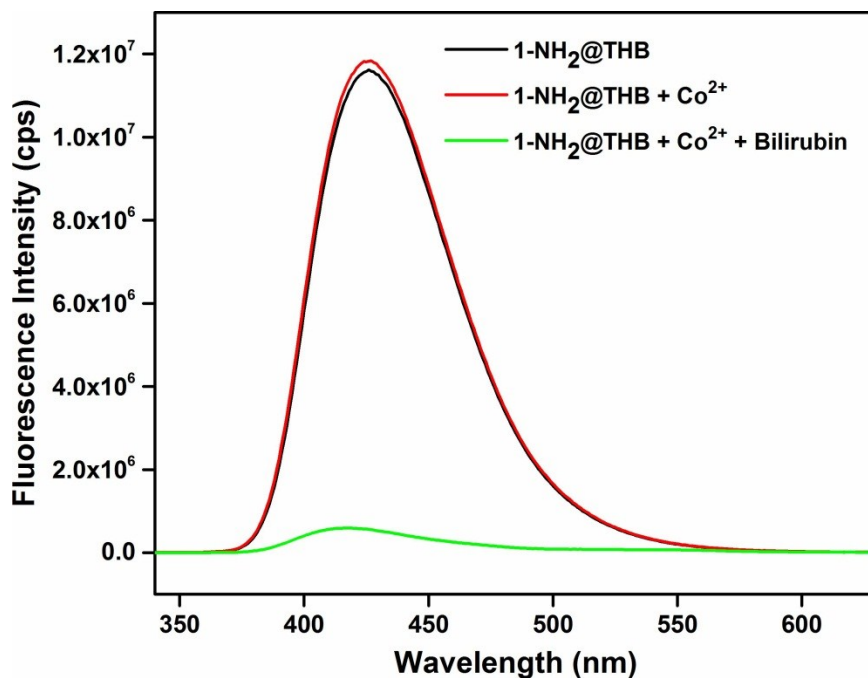

**Figure S36.** Change in the fluorescence emission intensity of **1-NH<sub>2</sub>@THB** upon addition of 1 mM bilirubin solution (200  $\mu$ L) in presence of Co<sup>2+</sup> (200  $\mu$ L) solution ( $\lambda_{\text{ex}}$ = 325 nm and  $\lambda_{\text{em}}$ = 429 nm).

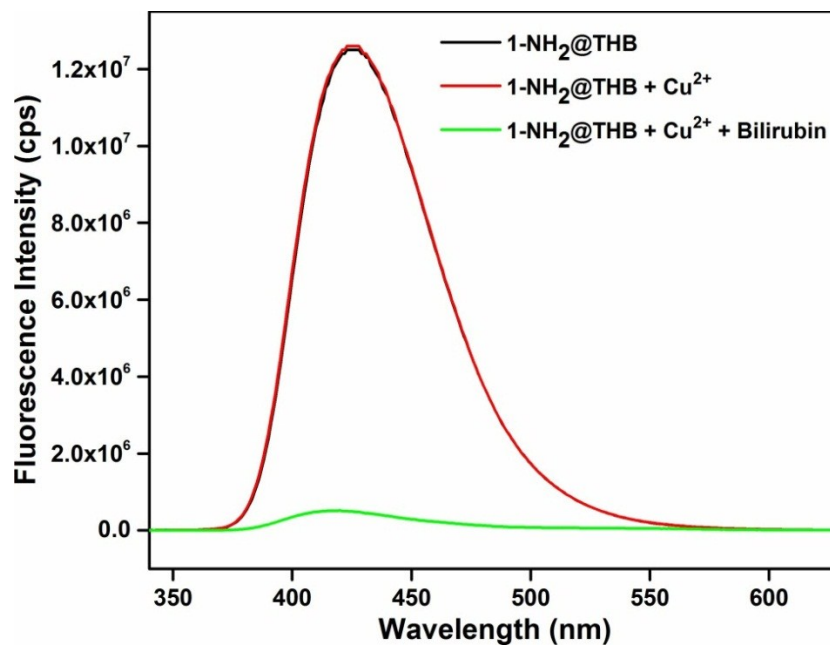

**Figure S37.** Change in the fluorescence emission intensity of **1-NH<sub>2</sub>@THB** upon addition of 1 mM bilirubin solution (200  $\mu$ L) in presence of Cu<sup>2+</sup> (200  $\mu$ L) solution ( $\lambda_{\text{ex}}$ = 325 nm and  $\lambda_{\text{em}}$ = 429 nm).

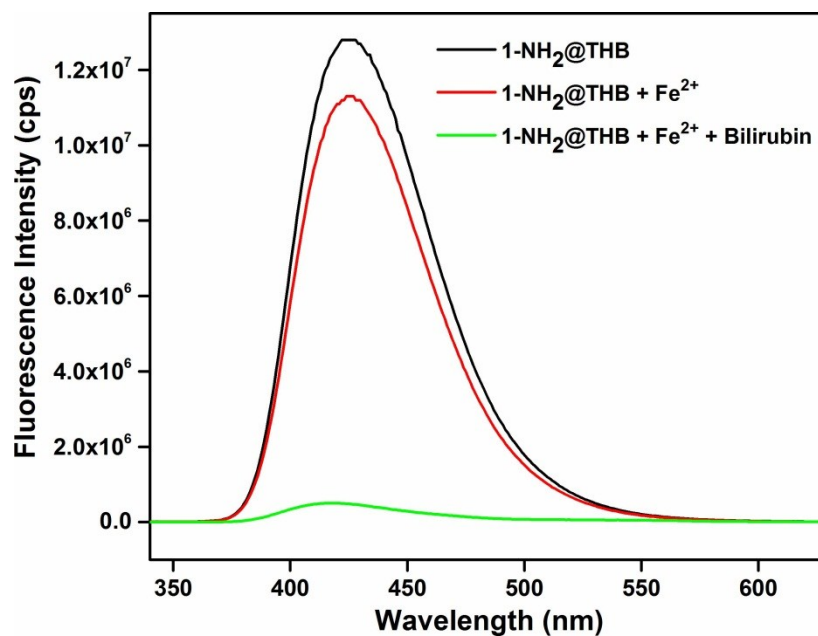

**Figure S38.** Change in the fluorescence emission intensity of **1-NH<sub>2</sub>@THB** upon addition of 1 mM bilirubin solution (200  $\mu$ L) in presence of Fe<sup>2+</sup> (200  $\mu$ L) solution ( $\lambda_{\text{ex}}$ = 325 nm and  $\lambda_{\text{em}}$ = 429 nm).

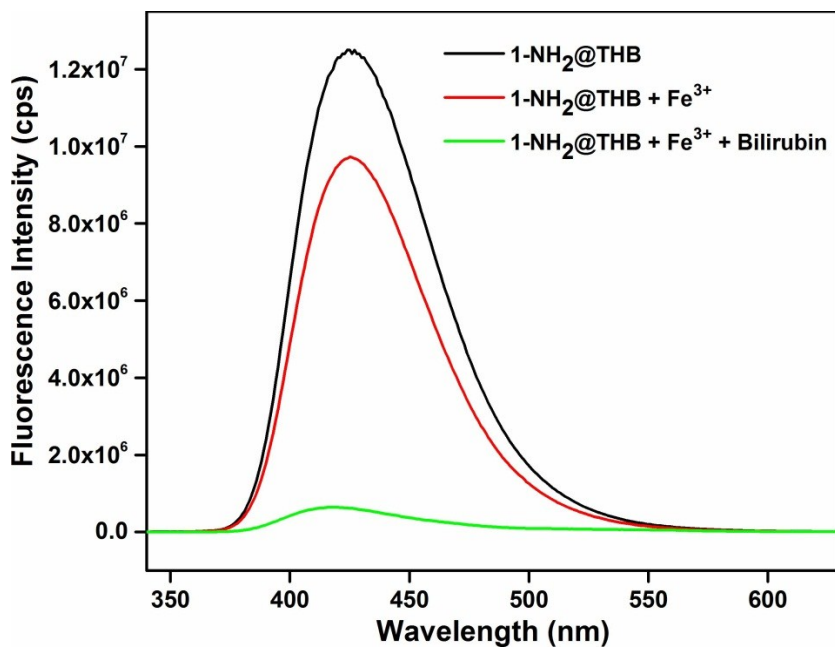

**Figure S39.** Change in the fluorescence emission intensity of **1-NH<sub>2</sub>@THB** upon addition of 1 mM bilirubin solution (200  $\mu$ L) in presence of Fe<sup>3+</sup> (200  $\mu$ L) solution ( $\lambda_{\text{ex}}$ = 325 nm and  $\lambda_{\text{em}}$ = 429 nm).

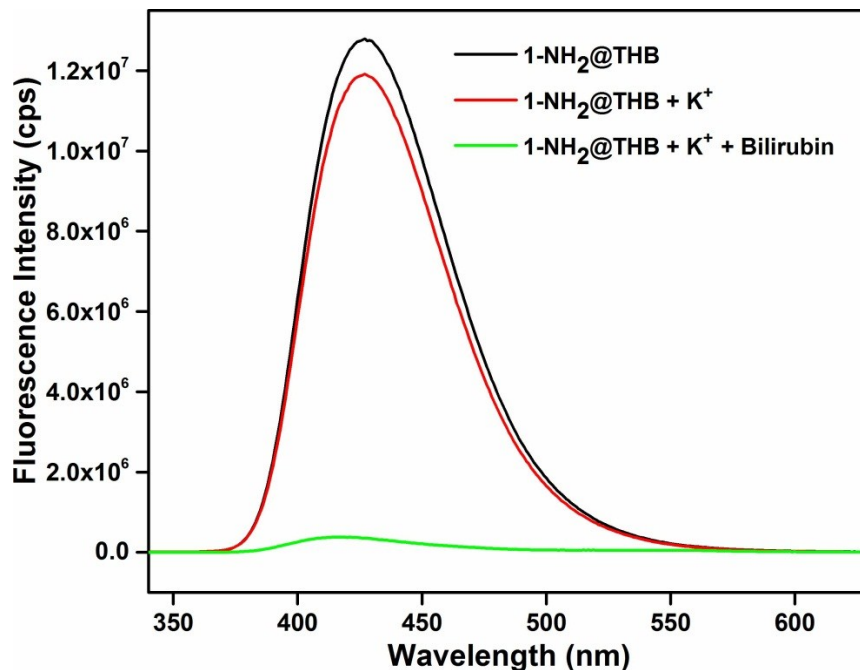

**Figure S40.** Change in the fluorescence emission intensity of **1-NH<sub>2</sub>@THB** upon addition of 1 mM bilirubin solution (200  $\mu$ L) in presence of K<sup>+</sup> (200  $\mu$ L) solution ( $\lambda_{\text{ex}}$ = 325 nm and  $\lambda_{\text{em}}$ = 429 nm).

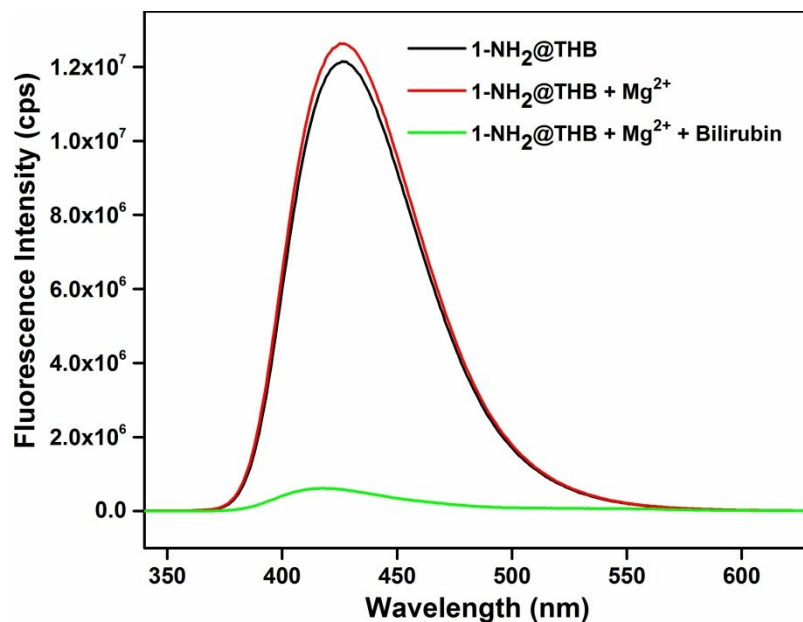

**Figure S41.** Change in the fluorescence emission intensity of 1-NH<sub>2</sub>@THB upon addition of 1 mM bilirubin solution (200  $\mu$ L) in presence of Mg<sup>2+</sup> (200  $\mu$ L) solution ( $\lambda_{\text{ex}}$  = 325 nm and  $\lambda_{\text{em}}$  = 429 nm).

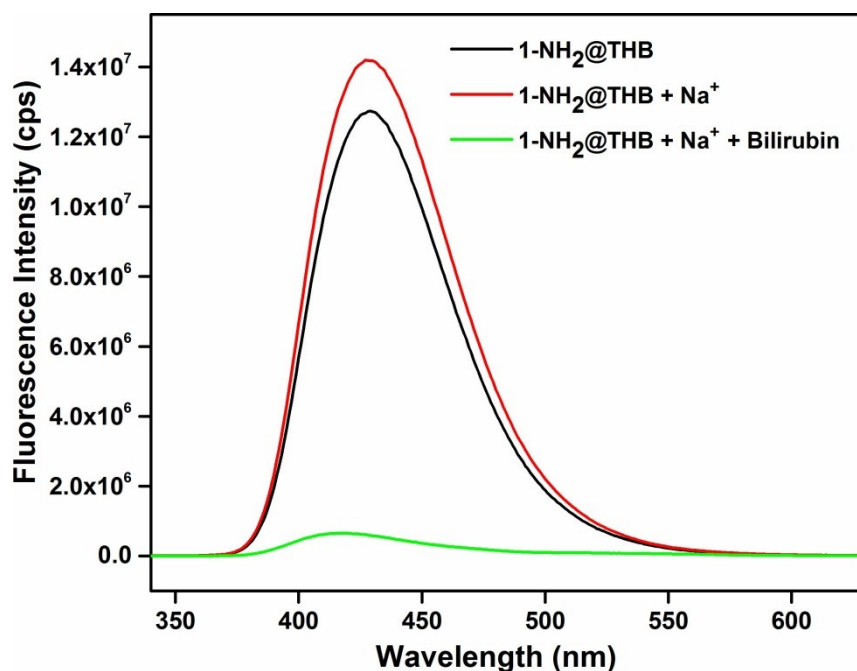

**Figure S42.** Change in the fluorescence emission intensity of 1-NH<sub>2</sub>@THB upon addition of 1 mM bilirubin solution (200  $\mu$ L) in presence of Na<sup>+</sup> (200  $\mu$ L) solution ( $\lambda_{\text{ex}}$  = 325 nm and  $\lambda_{\text{em}}$  = 429 nm).



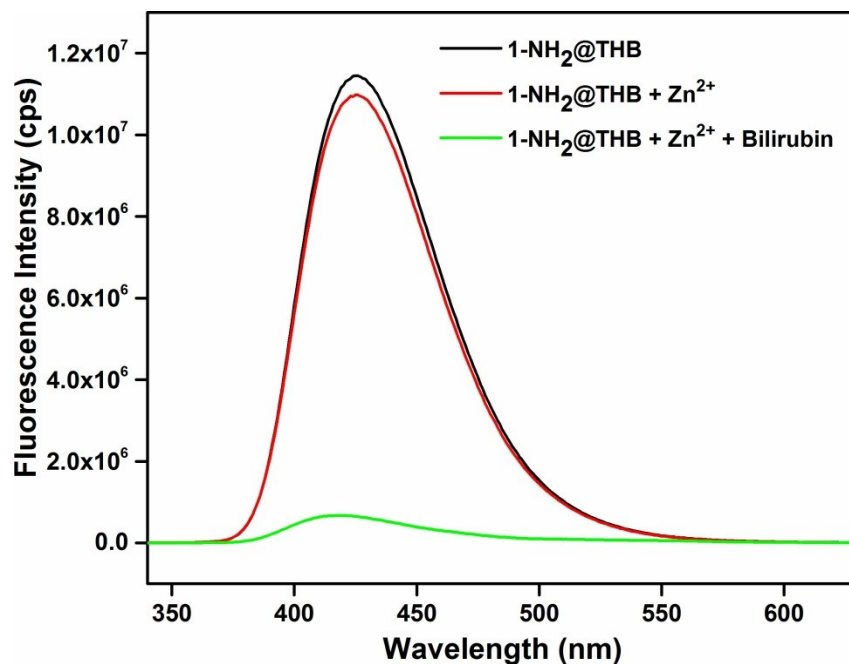

**Figure S43.** Change in the fluorescence emission intensity of **1-NH<sub>2</sub>@THB** upon addition of 1 mM bilirubin solution (200  $\mu$ L) in presence of  $Zn^{2+}$  (200  $\mu$ L) solution ( $\lambda_{ex}$  = 325 nm and  $\lambda_{em}$  = 429 nm).

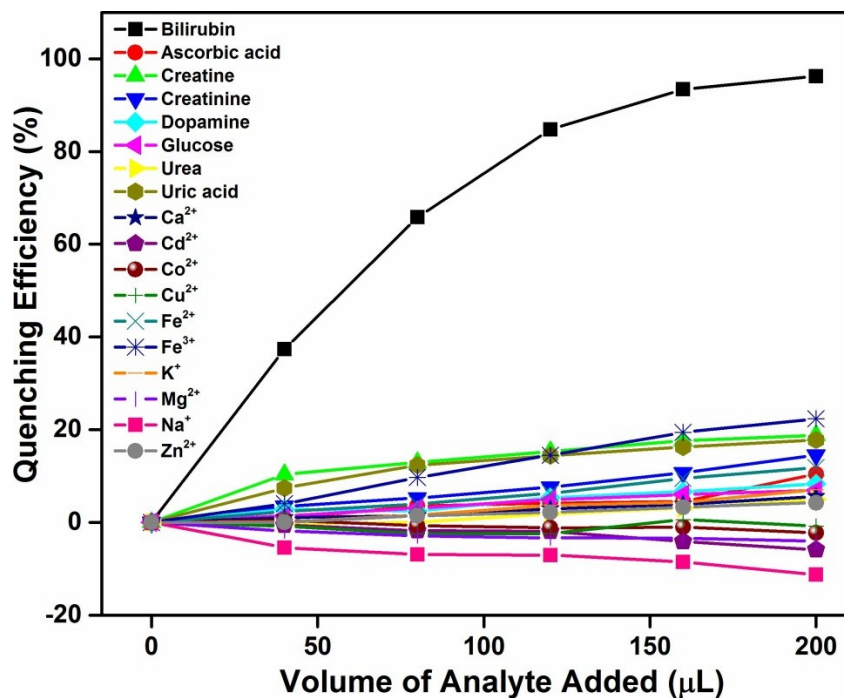

**Figure S44.** Variation of the fluorescence quenching efficiencies upon incremental addition of 1 mM solution of different competitive analytes to a 3 mL suspension of **1-NH<sub>2</sub>@THB**.

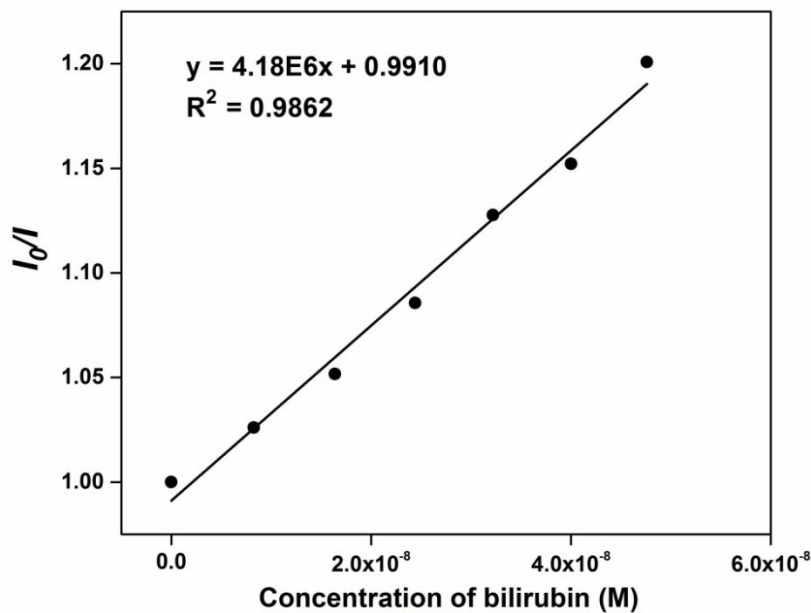

**Figure S45.** Stern-Volmer plot for the fluorescence emission quenching of **1-NH<sub>2</sub>@THB** in presence of bilirubin solution.

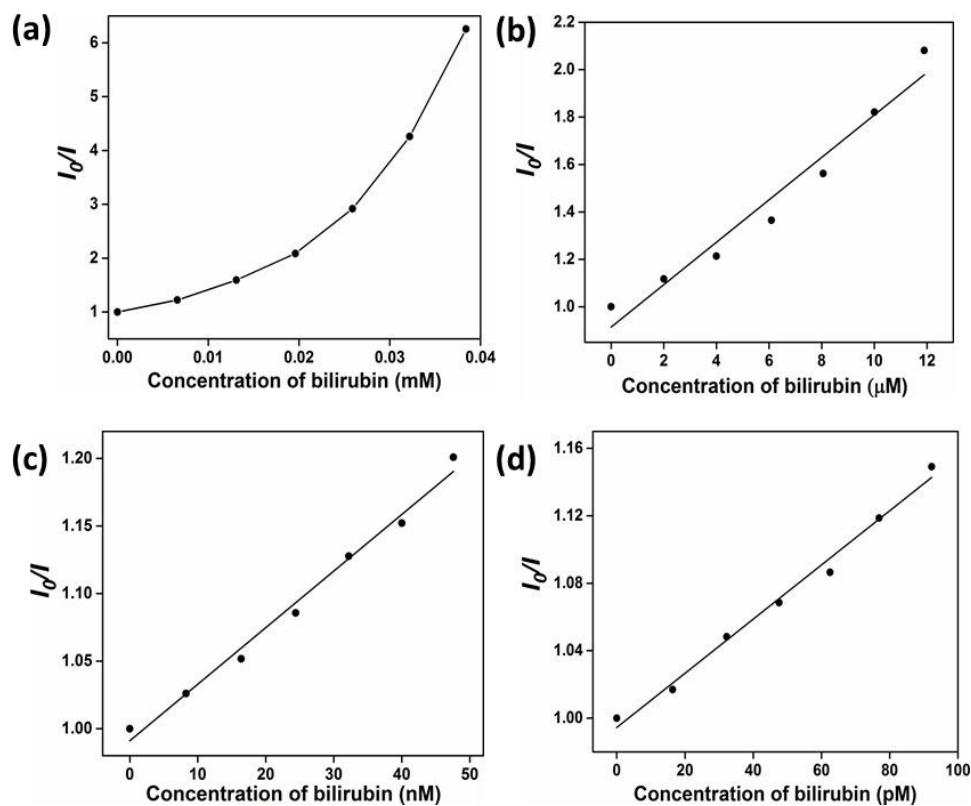

**Figure S46.** Relationships between  $I_0/I$  and concentrations of bilirubin in mili- (a), micro- (b), nano- (c), and picomolar (d) levels.

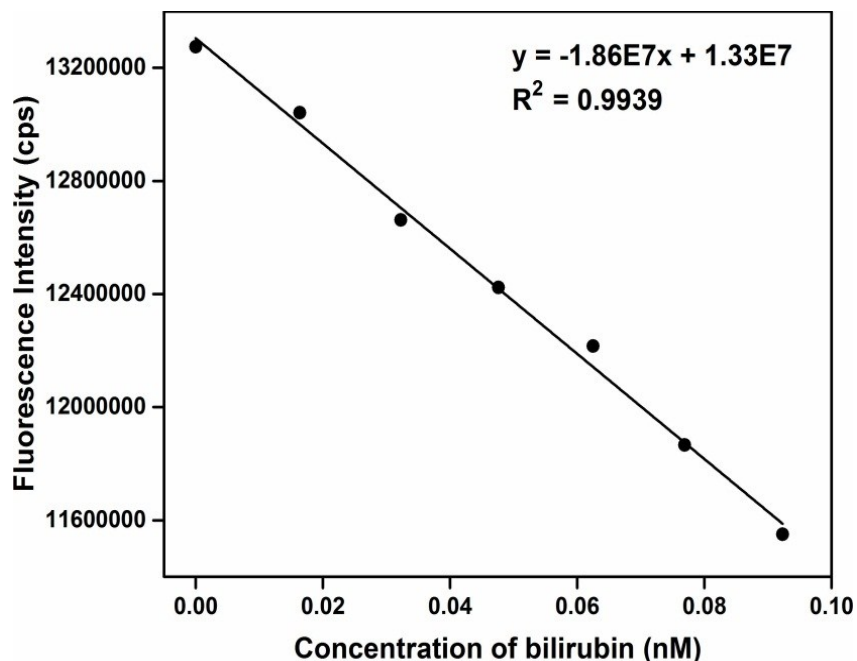

**Figure S47.** Change in the fluorescence emission intensity of 1-NH<sub>2</sub>@THB in HEPES buffer as a function of bilirubin concentration.

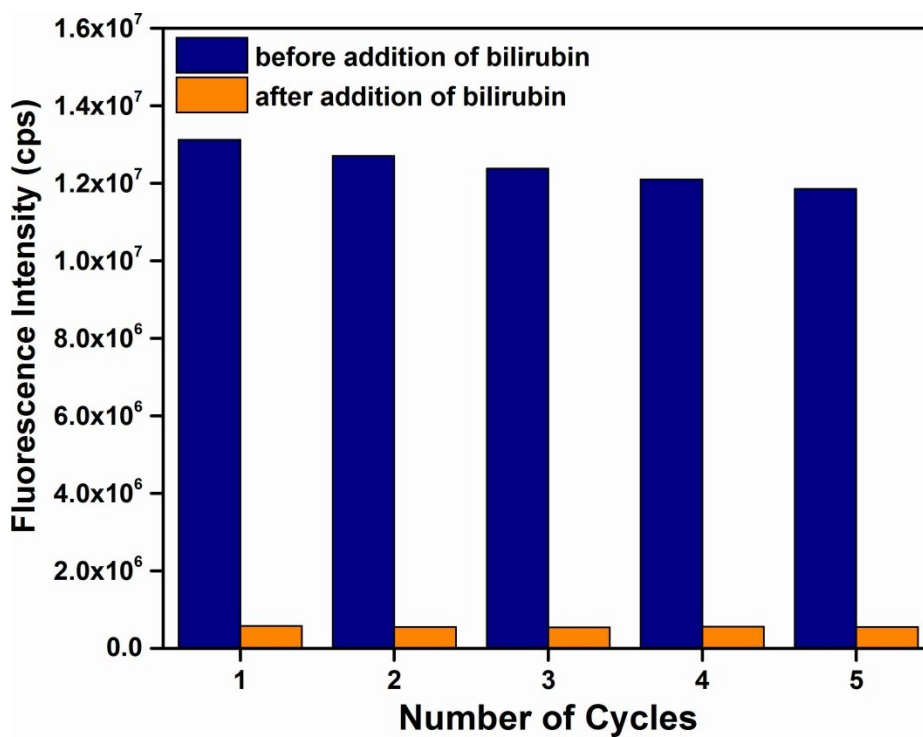

**Figure S48.** Recyclability of the quenching efficiency of the HEPES buffer suspension of 1-NH<sub>2</sub>@THB towards 1 mM bilirubin solution.

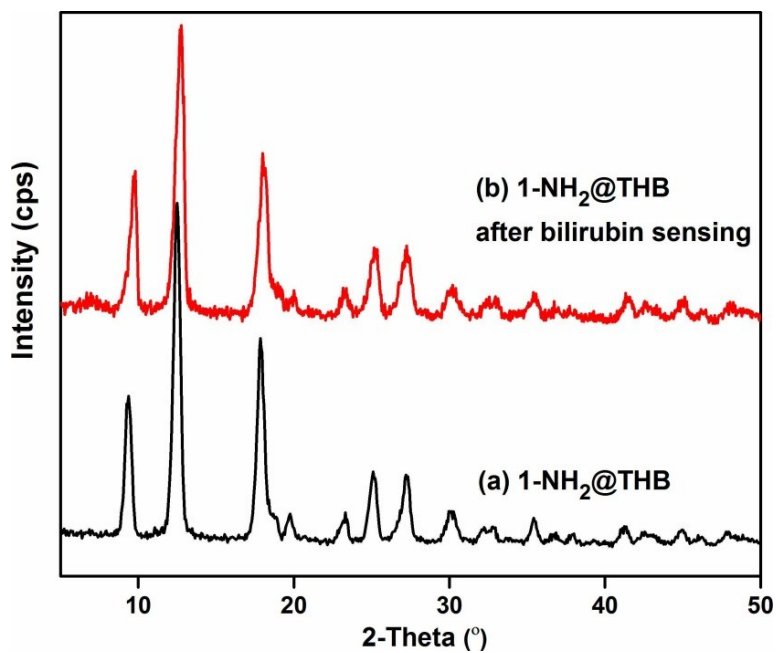

**Figure S49.** XRPD patterns of 1-NH<sub>2</sub>@THB before (a) and after sensing of bilirubin (b).

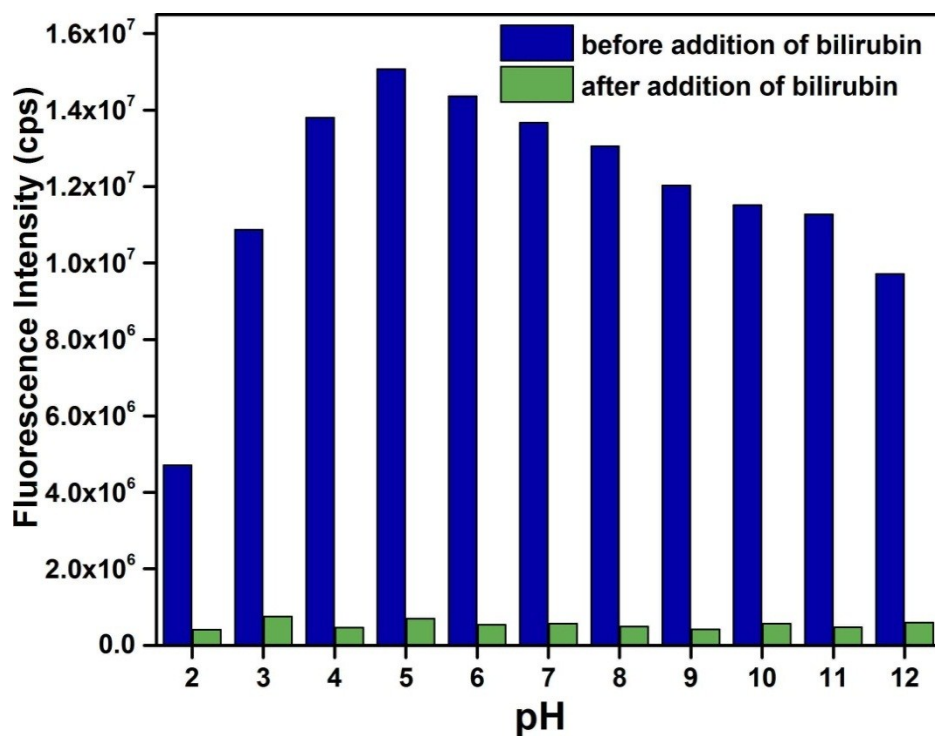

**Figure S50.** Effect of pH on fluorescence emission intensity of 1-NH<sub>2</sub>@THB before and after addition of 1 mM bilirubin solution (200  $\mu$ L).

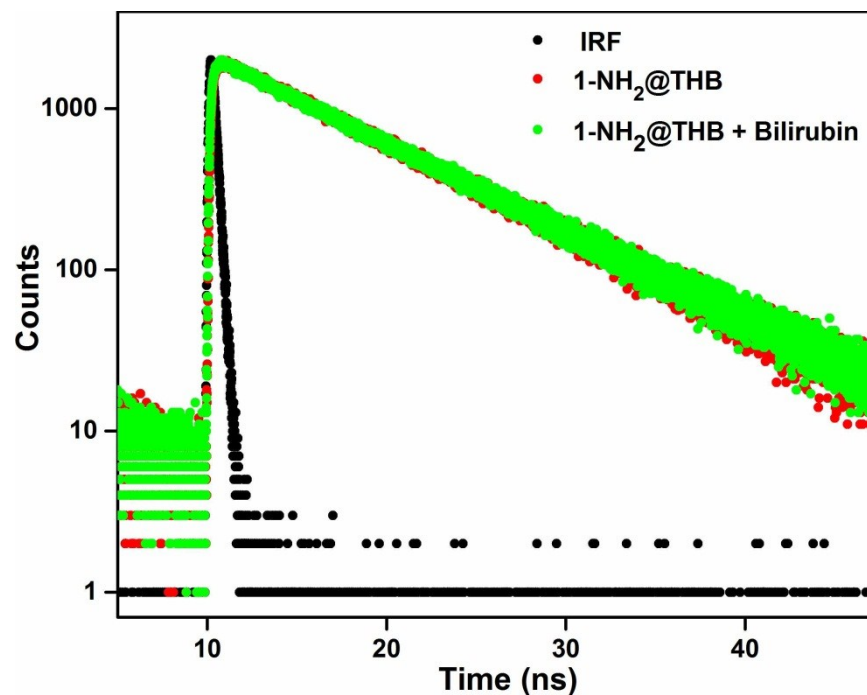

**Figure S51.** Lifetime decay profile of **1-NH<sub>2</sub>@THB** in the absence and presence of bilirubin solution ( $\lambda_{\text{ex}} = 336 \text{ nm}$ , monitored at 429 nm).

**Table S1.** Fluorescence lifetimes of **1-NH<sub>2</sub>@THB** before and after the addition of bilirubin ( $\lambda_{\text{ex}} = 336 \text{ nm}$ , pulsed diode laser).

| Volume of bilirubin ( $\mu\text{L}$ ) | $a_1$ | $a_2$ | $\tau_1$ (ns) | $\tau_2$ (ns) | $\langle\tau\rangle^*$ (ns) | $\chi^2$ |
|---------------------------------------|-------|-------|---------------|---------------|-----------------------------|----------|
| 0                                     | 0.985 | 0.014 | 7.852         | 0.019         | 7.734                       | 1.012    |
| 200                                   | 0.990 | 0.009 | 7.675         | 0.028         | 7.598                       | 1.013    |

*Average lifetime*  $\langle\tau\rangle^* = a_1 \tau_1 + a_2 \tau_2$

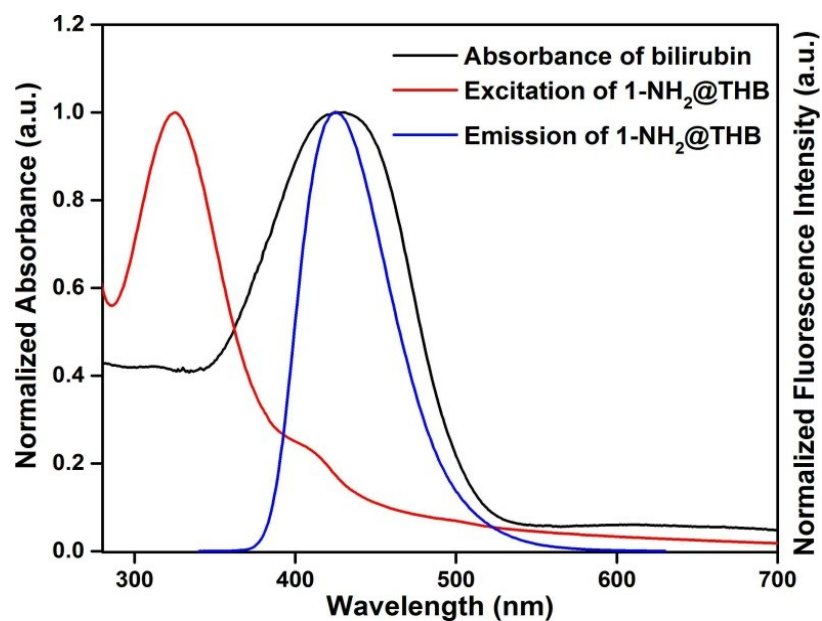

**Figure S52.** Normalized UV-vis spectrum of bilirubin overlapped with the normalized emission/excitation spectra of 1-NH<sub>2</sub>@THB in HEPES buffer.

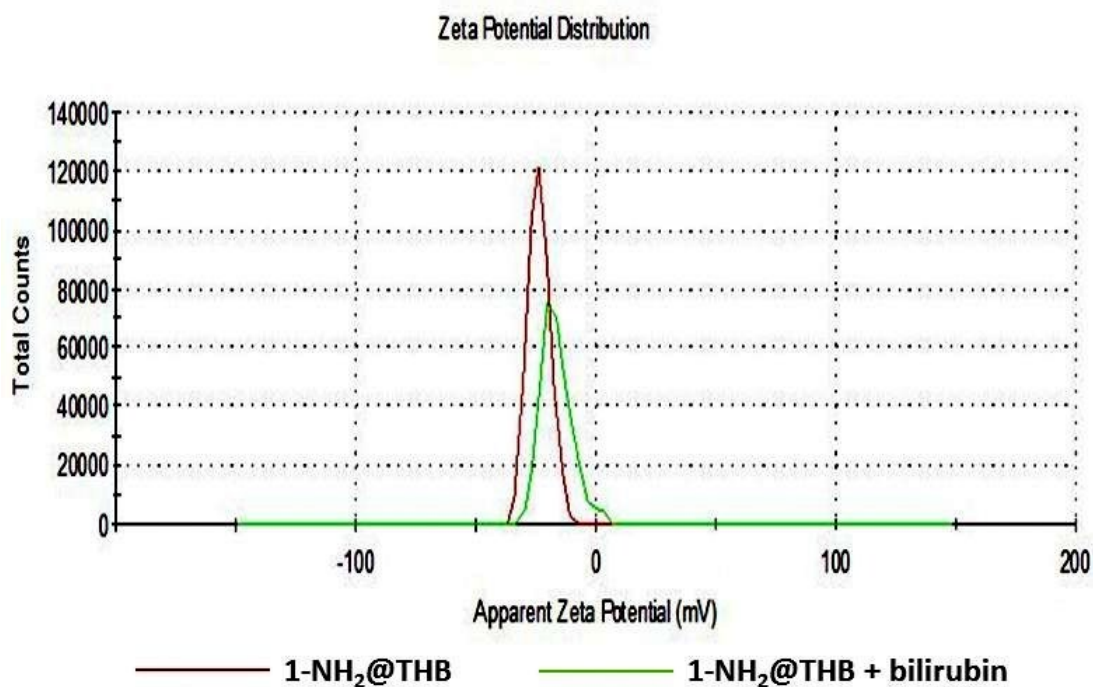

**Figure S53.** Zeta potential distribution of 1-NH<sub>2</sub>@THB in HEPES buffer medium (pH = 7.4) before and after addition of bilirubin.

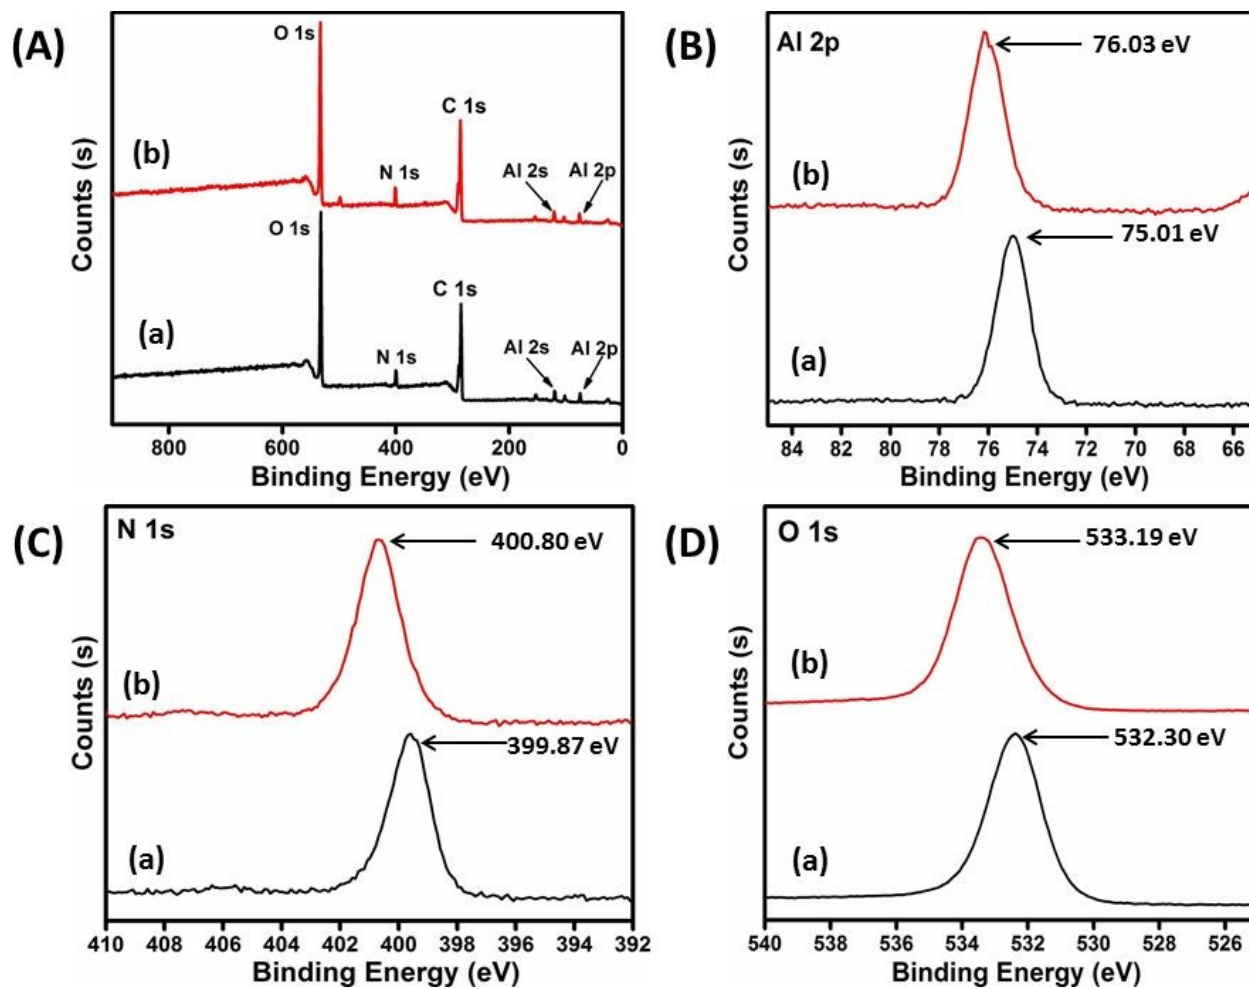

**Figure S54.** (A) XPS spectra of 1-NH<sub>2</sub>@THB (a) and bilirubin-treated 1-NH<sub>2</sub>@THB (b). High resolution XPS spectra of (B) Al 2p, (C) N 1s and (D) O 1s of 1-NH<sub>2</sub>@THB (a) and bilirubin-treated 1-NH<sub>2</sub>@THB (b).

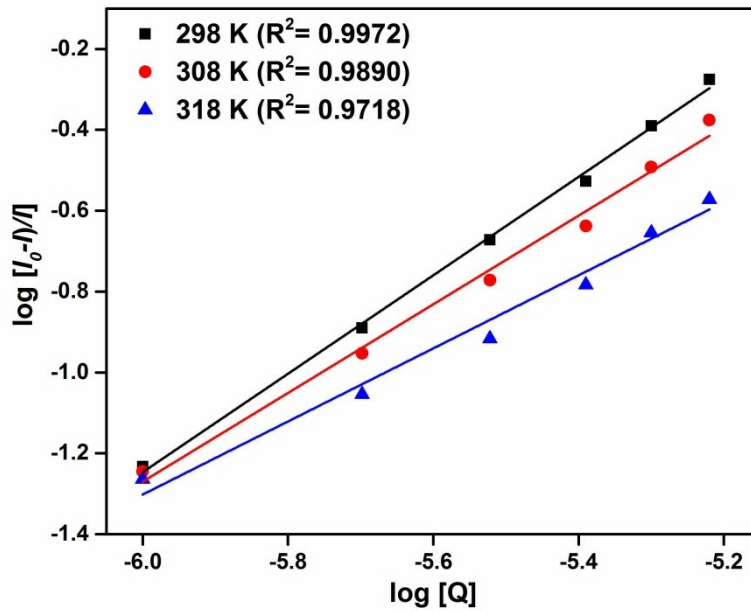

Figure S55.  $\log[(I_0-I)/I]$  vs  $\log[Q]$  plot at different temperatures.

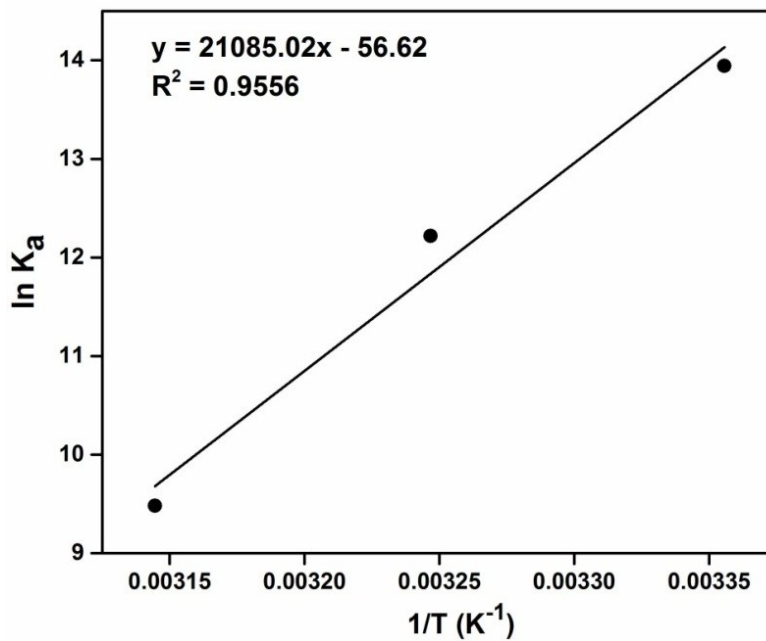

Figure S56. van't Hoff plot for the interactions between **1-NH<sub>2</sub>@THB** and bilirubin.



**Table S2.** Comparison of the results of various bilirubin sensors.

| A. Fluorescent sensors     |                                |                             |                  |                   |                                          |                                    |           |
|----------------------------|--------------------------------|-----------------------------|------------------|-------------------|------------------------------------------|------------------------------------|-----------|
| Sl. No.                    | Sensor Material                | Type of Material            | Medium Used      | Response Time (s) | Linear Range (M)                         | Detection Limit                    | Ref.      |
| 1                          | Al-MIL-53-NH <sub>2</sub> @THB | MOF                         | HEPES buffer     | 30                | 10 <sup>-12</sup> – 1.2×10 <sup>-5</sup> | 1.26 pM                            | This work |
| 2                          | UIO-66-PSM                     | MOF                         | PBS buffer       | 30                | 10 <sup>-13</sup> - 5×10 <sup>-4</sup>   | 0.59 pM                            | 1         |
| 3                          | PDPPF-co-Ph                    | polymer                     | THF              | -                 | 10 <sup>-6</sup> - 10 <sup>-5</sup>      | -                                  | 2         |
| 4                          | BAMD                           | organic molecule            | phosphate buffer | 600               | 10 <sup>-12</sup> - 5×10 <sup>-4</sup>   | 2.8 pM (pH=7.4)<br>3.3 pM (pH=9.0) | 3         |
| 5                          | PF-Ph-GlcA                     | polymer                     | PBS buffer       | -                 | -                                        | 150 nm                             | 4         |
| 6                          | HSA-AuNCs                      | nanoclusters                | phosphate buffer | -                 | 10 <sup>-6</sup> - 5×10 <sup>-5</sup>    | 248 nM                             | 5         |
| B. Electrochemical sensors |                                |                             |                  |                   |                                          |                                    |           |
| Sl. No.                    | Sensor Material                | Type of Material            | Linear Range     |                   | Detection Limit                          | Ref.                               |           |
| 7                          | SiO <sub>2</sub> @ZrONPs/ CHIT | nanoparticles               | 0.02- 250 μM     |                   | 0.1 nM                                   | 6                                  |           |
| 8                          | CuO-CdO NCs                    | nanocomposite               | 10.0 pM -10.0 mM |                   | 1.0 ± 0.1 pM                             | 7                                  |           |
| 9                          | HSA-AuNCs                      | nanomaterial                | 0.2-7.0μM        |                   | 86.32 nM                                 | 8                                  |           |
| 10                         | BOx/nano Au                    | nanorods                    | 0.01 -500 μM     |                   | 0.005 μM                                 | 9                                  |           |
| 11                         | RGO-PSS composite electrode    | carbon electrode            | 0 - 450 μM       |                   | 2.0 μM                                   | 10                                 |           |
| 12                         | BOx/GONP@Ppy/FTO               | graphene oxide nanoparticle | 0.01 – 500 mM    |                   | 0.1 nM                                   | 11                                 |           |
| 13                         | MWCNT                          | nanotubes                   | 0.5–500 μM       |                   | 0.3 ± 0.022 nM                           | 12                                 |           |

**References:**

1. Y. Du, X. Li, X. Lv and Q. Jia, *ACS Appl. Mater. Interfaces*, 2017, **9**, 30925-30932.
2. T. Senthilkumar and S. K. Asha, *Macromolecules*, 2013, **46**, 2159–2171.
3. S. Ellairaja, K. Shenbagavalli, S. Ponmariappan and V. S. Vasantha, *Biosens. Bioelectron.*, 2017, **91**, 82-88.
4. T. Senthilkumar and S. K. Asha, *Macromolecules*, 2015, **48**, 3449-3461.
5. M. Santhosh, S. R. Chinnadayala, A. Kakoti and P. Goswami, *Biosens. Bioelectron.*, 2014, **59**, 370-376.

6. B. Batra, S. Lata, Sunny, J. S. Rana and C. S. Pundir, *Biosens. Bioelectron.*, 2013, **44**, 64-69.
7. M. M. Rahmana, M. M. Hussain and A. M. Asiri, *Prog. Nat. Sci.: Mater. Int.*, 2017, **27**, 566-573.
8. M. Santhosh, S. R. Chinnadayala, N. K. Singh and P. Goswami, *Bioelectrochemistry*, 2016, **111**, 7-14.
9. J. Narang, N. Chauhan, A. Mathur, V. Chaturvedi and C. S. Pundir, *Adv. Mater. Lett.*, 2015, **6**, 1012-1017.
10. T. Balamurugan and S. Berchmans, *RSC Adv.*, 2015, **5**, 50470-50477
11. N. Chauhan, R. Rawal, V. Hooda and U. Jain, *RSC Adv.*, 2016, **6**, 63624-63633.
12. M. Thangamuthu, W. E. Gabriel, C. Santschi and O. J. F. Martin, *Sensors*, 2018, **18**, E800.
